# Supplementary material for: Accurate and efficient polymorph energy ranking with XDM-corrected hybrid DFT
Source: Royal Society of Chemistry journal article supplement (doi:10.1039/d2ce01594c), 2023-01-01
Supplement: d2ce01594c1.pdf [file d2ce01594c1.pdf]

## Supplementary Information: Accurate and Efficient Polymorph Energy Ranking with XDM-corrected hybrid DFT

Alastair J. A. Price,<sup>1</sup> R. Alex Mayo,<sup>1</sup> Alberto Otero de la Roza,<sup>2, a)</sup> and Erin R. Johnson<sup>1, b)</sup>

<sup>1)</sup>*Department of Chemistry, Dalhousie University, 6274 Coburg Road, P.O. Box 15000, Halifax, Nova Scotia B3H 4R2, Canada*

<sup>2)</sup>*Departamento de Química Física y Analítica, Facultad de Química, Universidad de Oviedo, 33006 Oviedo, Spain*

(Dated: 8 January 2023)

For the crystal structures belonging to the first to fifth blind tests (molecules I to XXI), duplicates were removed before the FHIaims calculations were performed. Two structures were considered replicas if their powder diffraction pattern difference measure (POWDIFF) as computed using the critic2 program with no volume correction applied was lower than 0.001.

An in-house script was subsequently used to identify and remove duplicates from the list of candidate structures after optimization for each target for compounds from all six blind tests. The structures within a 2 kJ/mol range of the structure being checked were compared by their POWDIFF values, again with no volume correction. If a value  $\leq 0.07$  was obtained, then the structure pair were compared with COMPACK (Mercury implementation via the CSD Python API) with a cluster size of 20 molecules and tolerances of  $\pm 30\%$  on the distances and  $\pm 30^\circ$  on the angles. If the structure pair yielded a match of 20/20 molecules by COMPACK, then they were considered duplicates and the higher energy structure was removed from the list. The number of replicates of a structure was also recorded.

TABLE I: Summary of the previous blind test results and numbers of structures considered. Reported are the number of matching structures identified in the previous blind test publications, the total number of candidate structures considered (after initial pruning of duplicates for BT1-5), and the number of unique candidate structures obtained after DFT optimization by removing duplicates.

| Compound | BT | Year | Matches         | Candidates | Unique |
|----------|----|------|-----------------|------------|--------|
| I        | 1  | 1999 | 4 <sup>a</sup>  | 33         | 26     |
| II       | 1  | 1999 | 1               | 24         | 22     |
| III      | 1  | 1999 | 2               | 29         | 25     |
| IV       | 2  | 2001 | 2               | 43         | 22     |
| V        | 2  | 2001 | 4               | 39         | 23     |
| VI       | 2  | 2001 | 0               | 33         | 31     |
| VII      | 1  | 1999 | 1               | 18         | 11     |
| VIII     | 3  | 2004 | 4               | 19         | 12     |
| IX       | 3  | 2004 | 1               | 27         | 18     |
| X        | 3  | 2004 | 0               | 24         | 22     |
| XI       | 3  | 2004 | 0               | 30         | 23     |
| XII      | 4  | 2007 | 4               | 37         | 27     |
| XIII     | 4  | 2007 | 4               | 38         | 23     |
| XIV      | 4  | 2007 | 3               | 35         | 22     |
| XV       | 4  | 2007 | 2               | 32         | 27     |
| XVI      | 5  | 2010 | 2               | 39         | 28     |
| XVII     | 5  | 2010 | 2               | 36         | 21     |
| XVIII    | 5  | 2010 | 1               | 37         | 30     |
| XIX      | 5  | 2010 | 2               | 28         | 23     |
| XX       | 5  | 2010 | 2               | 29         | 23     |
| XXI      | 5  | 2010 | 0               | 19         | 19     |
| XXII     | 6  | 2014 | 18              | 216        | 124    |
| XXIII    | 6  | 2014 | 29 <sup>b</sup> | 201        | 131    |
| XXIV     | 6  | 2014 | 1               | 163        | 129    |
| XXV      | 6  | 2014 | 8               | 184        | 118    |
| XXVI     | 6  | 2014 | 6               | 170        | 121    |

<sup>a</sup>All matches were for Form II. <sup>b</sup>Matches were 5 for Form A, 14 for Form B, 1 for Form C, 9 for Form D, and 0 for Form E.

<sup>a)</sup>Electronic mail: oteroalberto@uniovi.es

<sup>b)</sup>Electronic mail: erin.johnson@dal.ca

TABLE II: Computed energy ranking for unique candidate structures of compound I, 3-oxabicyclo[3.2.0]hepta-1,4-diene. Energies are expressed relative to the experimental form 1, in kJ/mol.

| Rank | GGA            |              |            | 25X            |              |            | 50X            |              |            |
|------|----------------|--------------|------------|----------------|--------------|------------|----------------|--------------|------------|
|      | Structure      | # Duplicates | $\Delta E$ | Structure      | # Duplicates | $\Delta E$ | Structure      | # Duplicates | $\Delta E$ |
| 1    | i-expt-1       | 2            | 0.0        | i-expt-2       | 0            | -0.2       | i-expt-2       | 0            | -0.8       |
| 2    | i-vaneijck-3   | 0            | 0.1        | i-vaneijck-3   | 0            | -0.0       | i-vaneijck-3   | 0            | -0.2       |
| 3    | i-expt-2       | 0            | 0.2        | i-expt-1       | 2            | 0.0        | i-expt-1       | 2            | 0.0        |
| 4    | i-williams-2   | 0            | 0.9        | i-williams-2   | 0            | 0.8        | i-williams-2   | 0            | 0.7        |
| 5    | i-ammon-2      | 0            | 1.3        | i-ammon-2      | 0            | 1.3        | i-ammon-2      | 0            | 1.2        |
| 6    | i-mooij-1      | 2            | 1.8        | i-gavezzotti-3 | 0            | 1.9        | i-gavezzotti-3 | 0            | 1.7        |
| 7    | i-schmidt-1    | 0            | 1.8        | i-schmidt-1    | 0            | 1.9        | i-schmidt-1    | 0            | 2.0        |
| 8    | i-gavezzotti-3 | 0            | 2.0        | i-mooij-1      | 2            | 2.1        | i-schmidt-3    | 2            | 2.4        |
| 9    | i-mooij-2      | 0            | 2.3        | i-mooij-2      | 0            | 2.6        | i-mooij-2      | 0            | 2.9        |
| 10   | i-verwer-2     | 0            | 2.4        | i-verwer-2     | 0            | 2.8        | i-verwer-2     | 0            | 3.1        |
| 11   | i-mooij-3      | 0            | 2.8        | i-hofmann-1    | 0            | 3.1        | i-gavezzotti-2 | 1            | 3.2        |
| 12   | i-hofmann-1    | 0            | 2.8        | i-mooij-3      | 0            | 3.3        | i-hofmann-1    | 0            | 3.5        |
| 13   | i-motherwell-1 | 1            | 3.2        | i-gavezzotti-2 | 1            | 3.3        | i-price-3      | 0            | 3.6        |
| 14   | i-price-3      | 0            | 3.2        | i-price-3      | 0            | 3.4        | i-lommerse-3   | 0            | 3.7        |
| 15   | i-ammon-1      | 0            | 3.8        | i-lommerse-3   | 0            | 3.9        | i-mooij-3      | 0            | 3.7        |
| 16   | i-lommerse-3   | 0            | 3.8        | i-ammon-1      | 0            | 3.9        | i-ammon-1      | 0            | 3.9        |
| 17   | i-price-2      | 0            | 4.0        | i-price-2      | 0            | 4.3        | i-price-2      | 0            | 4.6        |
| 18   | i-vaneijck-2   | 0            | 6.4        | i-verwer-3     | 0            | 6.5        | i-verwer-3     | 0            | 6.5        |
| 19   | i-verwer-3     | 0            | 6.4        | i-vaneijck-2   | 0            | 6.8        | i-lommerse-1   | 0            | 7.2        |
| 20   | i-hofmann-3    | 1            | 6.5        | i-lommerse-1   | 0            | 7.0        | i-vaneijck-2   | 0            | 7.3        |
| 21   | i-motherwell-2 | 0            | 6.6        | i-motherwell-2 | 0            | 7.2        | i-schmidt-2    | 0            | 7.5        |
| 22   | i-lommerse-1   | 0            | 6.6        | i-schmidt-2    | 0            | 7.2        | i-motherwell-2 | 0            | 7.7        |
| 23   | i-schmidt-2    | 0            | 6.7        | i-hofmann-3    | 1            | 7.4        | i-vaneijck-1   | 0            | 7.8        |
| 24   | i-lommerse-2   | 1            | 7.1        | i-vaneijck-1   | 0            | 7.5        | i-hofmann-3    | 1            | 8.1        |
| 25   | i-vaneijck-1   | 0            | 7.2        | i-ammon-3      | 1            | 7.9        | i-ammon-3      | 1            | 8.7        |
| 26   | i-motherwell-3 | 0            | 11.0       | i-motherwell-3 | 0            | 11.4       | i-motherwell-3 | 0            | 11.8       |

TABLE III: Computed energy ranking for unique candidate structures of compound II, 4-hydroxy-2-thiophenecarbonitrile. Energies are expressed relative to the experimental form, in kJ/mol.

| Rank | GGA             |              |            | 25X             |              |            | 50X             |              |            |
|------|-----------------|--------------|------------|-----------------|--------------|------------|-----------------|--------------|------------|
|      | Structure       | # Duplicates | $\Delta E$ | Structure       | # Duplicates | $\Delta E$ | Structure       | # Duplicates | $\Delta E$ |
| 1    | ii-verwer-3     | 0            | -1.1       | ii-verwer-3     | 0            | -0.7       | ii-verwer-3     | 0            | -0.5       |
| 2    | ii-price-1      | 0            | -0.1       | ii-expt         | 0            | 0.0        | ii-expt         | 0            | 0.0        |
| 3    | ii-verwer-1     | 0            | -0.0       | ii-price-1      | 0            | 0.3        | ii-price-1      | 0            | 0.7        |
| 4    | ii-expt         | 0            | 0.0        | ii-motherwell-1 | 0            | 0.9        | ii-motherwell-1 | 0            | 1.6        |
| 5    | ii-williams-2   | 1            | 0.1        | ii-verwer-1     | 0            | 1.1        | ii-williams-1   | 0            | 1.8        |
| 6    | ii-motherwell-1 | 0            | 0.2        | ii-williams-2   | 1            | 1.2        | ii-price-2      | 0            | 2.1        |
| 7    | ii-verwer-2     | 0            | 0.3        | ii-verwer-2     | 0            | 1.3        | ii-williams-2   | 1            | 2.3        |
| 8    | ii-price-2      | 0            | 0.9        | ii-williams-1   | 0            | 1.5        | ii-verwer-1     | 0            | 2.3        |
| 9    | ii-williams-1   | 0            | 1.0        | ii-price-2      | 0            | 1.5        | ii-verwer-2     | 0            | 2.4        |
| 10   | ii-motherwell-2 | 0            | 2.7        | ii-motherwell-2 | 0            | 3.3        | ii-motherwell-2 | 0            | 3.9        |
| 11   | ii-price-3      | 0            | 4.7        | ii-price-3      | 0            | 5.3        | ii-price-3      | 0            | 5.8        |
| 12   | ii-lommerse-3   | 0            | 6.4        | ii-hofmann-1    | 0            | 7.6        | ii-hofmann-1    | 0            | 8.1        |
| 13   | ii-hofmann-1    | 0            | 6.8        | ii-lommerse-3   | 0            | 7.6        | ii-lommerse-3   | 0            | 8.8        |
| 14   | ii-lommerse-2   | 0            | 10.7       | ii-schmidt-3    | 0            | 12.1       | ii-schmidt-3    | 0            | 12.6       |
| 15   | ii-lommerse-1   | 1            | 11.3       | ii-lommerse-2   | 0            | 12.2       | ii-schmidt-2    | 0            | 12.9       |
| 16   | ii-schmidt-3    | 0            | 11.7       | ii-schmidt-2    | 0            | 12.4       | ii-lommerse-2   | 0            | 13.7       |
| 17   | ii-schmidt-2    | 0            | 12.0       | ii-motherwell-3 | 1            | 12.8       | ii-motherwell-3 | 1            | 14.2       |
| 18   | ii-ammon-1      | 0            | 18.6       | ii-ammon-1      | 0            | 18.5       | ii-ammon-1      | 0            | 18.9       |
| 19   | ii-hofmann-2    | 0            | 20.8       | ii-ammon-2      | 0            | 21.0       | ii-ammon-2      | 0            | 20.8       |
| 20   | ii-ammon-2      | 0            | 21.6       | ii-hofmann-2    | 0            | 21.7       | ii-hofmann-2    | 0            | 22.9       |
| 21   | ii-ammon-3      | 0            | 25.8       | ii-ammon-3      | 0            | 24.4       | ii-ammon-3      | 0            | 23.5       |
| 22   | ii-hofmann-3    | 0            | 26.8       | ii-hofmann-3    | 0            | 25.9       | ii-hofmann-3    | 0            | 25.4       |

TABLE IV: Computed energy ranking for unique candidate structures of compound III, 2-(2-phenylethenyl)-1,3,2-benzodioxaborole. Energies are expressed relative to the experimental form, in kJ/mol.

| Rank | GGA              |              |            | 25X              |              |            | 50X              |              |            |
|------|------------------|--------------|------------|------------------|--------------|------------|------------------|--------------|------------|
|      | Structure        | # Duplicates | $\Delta E$ | Structure        | # Duplicates | $\Delta E$ | Structure        | # Duplicates | $\Delta E$ |
| 1    | iii-expt         | 0            | 0.0        | iii-expt         | 0            | 0.0        | iii-expt         | 0            | 0.0        |
| 2    | iii-williams-2   | 0            | 0.5        | iii-williams-2   | 0            | 0.6        | iii-williams-2   | 0            | 0.5        |
| 3    | iii-price-1      | 1            | 0.8        | iii-price-3      | 1            | 1.1        | iii-price-3      | 1            | 1.2        |
| 4    | iii-mooij-2      | 0            | 2.5        | iii-mooij-2      | 0            | 2.7        | iii-mooij-2      | 0            | 2.7        |
| 5    | iii-lommerse-1   | 0            | 4.6        | iii-vaneijck-3   | 0            | 4.4        | iii-vaneijck-3   | 0            | 3.8        |
| 6    | iii-vaneijck-3   | 0            | 4.7        | iii-lommerse-1   | 0            | 4.7        | iii-lommerse-1   | 0            | 4.4        |
| 7    | iii-verwer-2     | 0            | 5.2        | iii-verwer-2     | 0            | 5.3        | iii-verwer-2     | 0            | 5.2        |
| 8    | iii-vaneijck-2   | 2            | 5.4        | iii-ammon-2      | 2            | 6.0        | iii-mooij-3      | 0            | 6.4        |
| 9    | iii-mooij-3      | 0            | 6.1        | iii-mooij-3      | 0            | 6.3        | iii-price-2      | 2            | 6.5        |
| 10   | iii-lommerse-3   | 0            | 6.4        | iii-lommerse-3   | 0            | 6.7        | iii-lommerse-3   | 0            | 6.7        |
| 11   | iii-verwer-1     | 0            | 6.6        | iii-verwer-1     | 0            | 7.1        | iii-verwer-1     | 0            | 7.8        |
| 12   | iii-schmidt-3    | 0            | 6.7        | iii-schmidt-3    | 0            | 7.3        | iii-motherwell-3 | 0            | 7.8        |
| 13   | iii-motherwell-3 | 0            | 7.0        | iii-motherwell-3 | 0            | 7.7        | iii-schmidt-3    | 0            | 8.0        |
| 14   | iii-motherwell-2 | 0            | 8.3        | iii-motherwell-2 | 0            | 8.7        | iii-motherwell-2 | 0            | 9.0        |
| 15   | iii-ammon-3      | 1            | 8.5        | iii-hofmann-1    | 1            | 9.1        | iii-hofmann-1    | 1            | 9.6        |
| 16   | iii-gavezzotti-1 | 0            | 9.0        | iii-gavezzotti-1 | 0            | 9.7        | iii-gavezzotti-1 | 0            | 10.4       |
| 17   | iii-verwer-3     | 0            | 9.1        | iii-verwer-3     | 0            | 9.9        | iii-verwer-3     | 0            | 10.8       |
| 18   | iii-schmidt-2    | 0            | 9.7        | iii-schmidt-2    | 0            | 10.5       | iii-schmidt-2    | 0            | 11.2       |
| 19   | iii-ammon-1      | 0            | 10.0       | iii-schmidt-1    | 0            | 11.0       | iii-schmidt-1    | 0            | 11.9       |
| 20   | iii-schmidt-1    | 0            | 10.2       | iii-ammon-1      | 0            | 11.1       | iii-gavezzotti-2 | 0            | 12.2       |
| 21   | iii-gavezzotti-2 | 0            | 10.2       | iii-gavezzotti-2 | 0            | 11.2       | iii-ammon-1      | 0            | 12.2       |
| 22   | iii-lommerse-2   | 0            | 15.1       | iii-lommerse-2   | 0            | 16.5       | iii-lommerse-2   | 0            | 17.7       |
| 23   | iii-motherwell-1 | 0            | 17.0       | iii-motherwell-1 | 0            | 18.6       | iii-motherwell-1 | 0            | 19.8       |
| 24   | iii-hofmann-2    | 0            | 23.0       | iii-hofmann-2    | 0            | 25.5       | iii-hofmann-2    | 0            | 27.3       |
| 25   | iii-hofmann-3    | 0            | 25.2       | iii-hofmann-3    | 0            | 27.1       | iii-hofmann-3    | 0            | 28.1       |

TABLE V: Computed energy ranking for unique candidate structures of compound IV, 3-azabicyclo[3.3.1]nonane-2,4-dione. Energies are expressed relative to the experimental form, in kJ/mol.

| Rank | GGA              |              |            | 25X              |              |            | 50X              |              |            |
|------|------------------|--------------|------------|------------------|--------------|------------|------------------|--------------|------------|
|      | Structure        | # Duplicates | $\Delta E$ | Structure        | # Duplicates | $\Delta E$ | Structure        | # Duplicates | $\Delta E$ |
| 1    | iv-expt          | 1            | 0.0        | iv-expt          | 1            | 0.0        | iv-expt          | 1            | 0.0        |
| 2    | iv-ammon-1       | 7            | 2.6        | iv-ammon-1       | 7            | 2.1        | iv-schmidt-1     | 7            | 1.7        |
| 3    | iv-ammon-2       | 0            | 3.3        | iv-ammon-2       | 0            | 3.3        | iv-ammon-2       | 0            | 3.2        |
| 4    | iv-scheraga-3    | 2            | 4.8        | iv-ammon-3       | 2            | 4.6        | iv-ammon-3       | 2            | 4.3        |
| 5    | iv-motherwell-3  | 6            | 5.3        | iv-price-3       | 6            | 5.5        | iv-lommerse-3    | 1            | 5.5        |
| 6    | iv-motherwell-2  | 0            | 5.4        | iv-motherwell-2  | 0            | 5.6        | iv-motherwell-2  | 0            | 5.7        |
| 7    | iv-williams-2    | 0            | 5.8        | iv-lommerse-3    | 1            | 5.8        | iv-price-3       | 6            | 5.7        |
| 8    | iv-lommerse-1    | 0            | 5.9        | iv-lommerse-1    | 0            | 6.2        | iv-lommerse-1    | 0            | 6.3        |
| 9    | iv-lommerse-3    | 1            | 6.0        | iv-williams-2    | 0            | 6.2        | iv-williams-2    | 0            | 6.6        |
| 10   | iv-erk-1         | 2            | 6.5        | iv-erk-1         | 2            | 6.7        | iv-erk-1         | 2            | 6.9        |
| 11   | iv-schweizer-2   | 0            | 6.8        | iv-price-2       | 0            | 7.2        | iv-price-2       | 0            | 7.5        |
| 12   | iv-price-2       | 0            | 6.9        | iv-schweizer-2   | 0            | 7.2        | iv-schweizer-2   | 0            | 7.8        |
| 13   | iv-motherwell-1  | 0            | 7.4        | iv-motherwell-1  | 0            | 7.6        | iv-motherwell-1  | 0            | 7.9        |
| 14   | iv-price-1       | 0            | 8.5        | iv-price-1       | 0            | 8.9        | iv-leusen-2      | 1            | 9.1        |
| 15   | iv-schmidt-3     | 1            | 8.9        | iv-leusen-2      | 1            | 9.0        | iv-schmidt-3     | 1            | 9.3        |
| 16   | iv-vaneijck-2    | 1            | 9.0        | iv-schmidt-3     | 1            | 9.1        | iv-price-1       | 0            | 9.4        |
| 17   | iv-hofmann-3     | 0            | 9.3        | iv-hofmann-3     | 0            | 9.6        | iv-hofmann-3     | 0            | 9.8        |
| 18   | iv-dzyabchenko-3 | 0            | 9.9        | iv-dzyabchenko-3 | 0            | 10.1       | iv-dzyabchenko-3 | 0            | 9.9        |
| 19   | iv-schweizer-3   | 0            | 10.2       | iv-schweizer-3   | 0            | 10.4       | iv-williams-3    | 0            | 10.1       |
| 20   | iv-schweizer-1   | 0            | 10.4       | iv-williams-3    | 0            | 10.5       | iv-schweizer-3   | 0            | 10.6       |
| 21   | iv-williams-3    | 0            | 10.9       | iv-schweizer-1   | 0            | 10.7       | iv-schweizer-1   | 0            | 11.0       |
| 22   | iv-hofmann-2     | 0            | 11.1       | iv-hofmann-2     | 0            | 11.2       | iv-hofmann-2     | 0            | 11.4       |

TABLE VI: Computed energy ranking for unique candidate structures of compound V, 7-endo-(bromocamphorylsulfonyl)imine. Energies are expressed relative to the experimental form, in kJ/mol.

| Rank | GGA             |              |            | 25X             |              |            | 50X             |              |            |
|------|-----------------|--------------|------------|-----------------|--------------|------------|-----------------|--------------|------------|
|      | Structure       | # Duplicates | $\Delta E$ | Structure       | # Duplicates | $\Delta E$ | Structure       | # Duplicates | $\Delta E$ |
| 1    | v-leusen-1      | 0            | -1.9       | v-williams-1    | 0            | -1.9       | v-williams-1    | 0            | -1.5       |
| 2    | v-williams-1    | 0            | -1.9       | v-leusen-1      | 0            | -1.6       | v-leusen-1      | 0            | -1.1       |
| 3    | v-scheraga-1    | 2            | -1.4       | v-mooy-2        | 2            | -1.1       | v-mooy-2        | 2            | -0.7       |
| 4    | v-expt          | 4            | 0.0        | v-expt          | 4            | 0.0        | v-expt          | 4            | 0.0        |
| 5    | v-price-3       | 2            | 1.2        | v-price-3       | 2            | 0.6        | v-price-3       | 2            | 0.3        |
| 6    | v-dzyabchenko-2 | 1            | 1.5        | v-dzyabchenko-2 | 1            | 1.3        | v-vaneijck-3    | 0            | 1.3        |
| 7    | v-vaneijck-3    | 0            | 1.7        | v-vaneijck-3    | 0            | 1.5        | v-dzyabchenko-2 | 1            | 1.3        |
| 8    | v-scheraga-2    | 1            | 2.2        | v-scheraga-2    | 1            | 1.6        | v-ammon-3       | 1            | 1.3        |
| 9    | v-motherwell-2  | 0            | 3.5        | v-motherwell-2  | 0            | 3.5        | v-motherwell-2  | 0            | 3.8        |
| 10   | v-erk-3         | 0            | 3.5        | v-erk-1         | 3            | 4.1        | v-erk-1         | 3            | 4.6        |
| 11   | v-erk-1         | 3            | 3.9        | v-erk-3         | 0            | 4.3        | v-erk-3         | 0            | 5.3        |
| 12   | v-lommerse-2    | 0            | 5.9        | v-lommerse-2    | 0            | 5.9        | v-lommerse-2    | 0            | 6.1        |
| 13   | v-hofmann-1     | 0            | 6.8        | v-hofmann-1     | 0            | 7.2        | v-hofmann-1     | 0            | 8.0        |
| 14   | v-schmidt-1     | 0            | 8.5        | v-schmidt-1     | 0            | 8.8        | v-schmidt-3     | 0            | 9.4        |
| 15   | v-schmidt-3     | 0            | 9.0        | v-schmidt-3     | 0            | 9.0        | v-schmidt-1     | 0            | 9.6        |
| 16   | v-gavezzotti-1  | 3            | 9.4        | v-erk-2         | 3            | 10.2       | v-dzyabchenko-3 | 0            | 10.2       |
| 17   | v-hofmann-3     | 0            | 10.0       | v-hofmann-3     | 0            | 10.4       | v-hofmann-3     | 0            | 10.7       |
| 18   | v-dzyabchenko-3 | 0            | 11.4       | v-dzyabchenko-3 | 0            | 10.6       | v-erk-2         | 3            | 11.3       |
| 19   | v-schmidt-2     | 0            | 11.8       | v-schmidt-2     | 0            | 13.0       | v-schmidt-2     | 0            | 14.6       |
| 20   | v-gavezzotti-2  | 0            | 12.6       | v-gavezzotti-2  | 0            | 14.0       | v-gavezzotti-2  | 0            | 15.6       |
| 21   | v-hofmann-2     | 0            | 16.5       | v-hofmann-2     | 0            | 17.6       | v-hofmann-2     | 0            | 18.9       |
| 22   | v-lommerse-1    | 0            | 20.4       | v-lommerse-1    | 0            | 20.8       | v-lommerse-1    | 0            | 21.6       |
| 23   | v-vaneick-2     | 0            | 22.1       | v-vaneick-2     | 0            | 22.1       | v-vaneick-2     | 0            | 22.7       |

TABLE VII: Computed energy ranking for unique candidate structures of compound VI, 6-amino-2-phenylsulfonylimino-1,2-dihydropyridine. Energies are expressed relative to the experimental form, in kJ/mol.

| Rank | GGA              |              |            | 25X              |              |            | 50X              |              |            |
|------|------------------|--------------|------------|------------------|--------------|------------|------------------|--------------|------------|
|      | Structure        | # Duplicates | $\Delta E$ | Structure        | # Duplicates | $\Delta E$ | Structure        | # Duplicates | $\Delta E$ |
| 1    | vi-expt          | 0            | 0.0        | vi-expt          | 0            | 0.0        | vi-expt          | 0            | 0.0        |
| 2    | vi-erk-1         | 0            | 7.5        | vi-mooy-3        | 0            | 8.1        | vi-mooy-3        | 0            | 8.0        |
| 3    | vi-mooy-3        | 0            | 8.6        | vi-erk-1         | 0            | 8.2        | vi-erk-1         | 0            | 8.7        |
| 4    | vi-vaneijck-3    | 0            | 11.9       | vi-vaneijck-3    | 0            | 12.4       | vi-vaneijck-3    | 0            | 12.6       |
| 5    | vi-mooy-1        | 1            | 13.6       | vi-vaneick-2     | 1            | 14.2       | vi-vaneick-2     | 1            | 14.6       |
| 6    | vi-vaneijck-1    | 0            | 14.7       | vi-vaneijck-1    | 0            | 15.8       | vi-schmidt-1     | 0            | 15.7       |
| 7    | vi-dzyabchenko-2 | 0            | 15.1       | vi-dzyabchenko-2 | 0            | 16.1       | vi-vaneijck-1    | 0            | 16.5       |
| 8    | vi-schmidt-1     | 0            | 16.7       | vi-schmidt-1     | 0            | 16.1       | vi-dzyabchenko-2 | 0            | 16.6       |
| 9    | vi-leusen-2      | 0            | 18.6       | vi-dzyabchenko-3 | 0            | 18.4       | vi-dzyabchenko-3 | 0            | 17.8       |
| 10   | vi-dzyabchenko-3 | 0            | 18.9       | vi-leusen-2      | 0            | 19.6       | vi-leusen-2      | 0            | 20.6       |
| 11   | vi-scheraga-2    | 0            | 19.2       | vi-schmidt-3     | 0            | 20.4       | vi-schmidt-3     | 0            | 21.0       |
| 12   | vi-schmidt-3     | 0            | 19.7       | vi-scheraga-2    | 0            | 20.7       | vi-scheraga-2    | 0            | 21.9       |
| 13   | vi-dzyabchenko-1 | 0            | 20.7       | vi-dzyabchenko-1 | 0            | 21.8       | vi-dzyabchenko-1 | 0            | 22.6       |
| 14   | vi-williams-1    | 0            | 20.7       | vi-williams-1    | 0            | 22.6       | vi-williams-1    | 0            | 24.3       |
| 15   | vi-mooy-2        | 0            | 24.4       | vi-verwer-1      | 0            | 24.8       | vi-verwer-1      | 0            | 25.3       |
| 16   | vi-verwer-1      | 0            | 24.4       | vi-verwer-3      | 0            | 25.6       | vi-verwer-3      | 0            | 26.0       |
| 17   | vi-verwer-3      | 0            | 25.1       | vi-ammon-2       | 0            | 25.9       | vi-ammon-2       | 0            | 26.0       |
| 18   | vi-verwer-2      | 0            | 25.4       | vi-verwer-2      | 0            | 26.2       | vi-verwer-2      | 0            | 26.7       |
| 19   | vi-ammon-2       | 0            | 26.0       | vi-mooy-2        | 0            | 26.9       | vi-mooy-2        | 0            | 29.2       |
| 20   | vi-scheraga-1    | 0            | 27.8       | vi-ammon-1       | 0            | 28.7       | vi-ammon-1       | 0            | 29.6       |
| 21   | vi-erk-2         | 0            | 28.0       | vi-scheraga-1    | 0            | 29.7       | vi-scheraga-1    | 0            | 31.1       |
| 22   | vi-williams-2    | 0            | 28.1       | vi-williams-2    | 0            | 30.2       | vi-williams-2    | 0            | 32.1       |
| 23   | vi-ammon-1       | 0            | 28.2       | vi-erk-2         | 0            | 30.7       | vi-erk-2         | 0            | 33.0       |
| 24   | vi-hofmann-3     | 1            | 29.0       | vi-hofmann-3     | 1            | 31.6       | vi-hofmann-3     | 1            | 33.7       |
| 25   | vi-ammon-3       | 0            | 32.0       | vi-ammon-3       | 0            | 33.7       | vi-ammon-3       | 0            | 35.7       |
| 26   | vi-hofmann-1     | 0            | 38.5       | vi-hofmann-1     | 0            | 41.2       | vi-hofmann-1     | 0            | 43.8       |
| 27   | vi-schmidt-2     | 0            | 40.7       | vi-schmidt-2     | 0            | 43.9       | vi-schmidt-2     | 0            | 47.1       |
| 28   | vi-leusen-1      | 0            | 42.2       | vi-leusen-1      | 0            | 45.7       | vi-leusen-1      | 0            | 48.7       |
| 29   | vi-scheraga-3    | 0            | 43.7       | vi-scheraga-3    | 0            | 46.5       | vi-scheraga-3    | 0            | 49.5       |
| 30   | vi-leusen-3      | 0            | 46.1       | vi-leusen-3      | 0            | 49.2       | vi-leusen-3      | 0            | 52.5       |
| 31   | vi-hofmann-2     | 0            | 54.0       | vi-hofmann-2     | 0            | 56.3       | vi-hofmann-2     | 0            | 58.5       |

TABLE VIII: Computed energy ranking for unique candidate structures of compound VII, propane. Energies are expressed relative to the experimental form, in kJ/mol.

| Rank | GGA              |              |            | 25X              |              |            | 50X              |              |            |
|------|------------------|--------------|------------|------------------|--------------|------------|------------------|--------------|------------|
|      | Structure        | # Duplicates | $\Delta E$ | Structure        | # Duplicates | $\Delta E$ | Structure        | # Duplicates | $\Delta E$ |
| 1    | vii-expt         | 2            | 0.0        | vii-expt         | 2            | 0.0        | vii-expt         | 2            | 0.0        |
| 2    | vii-williams-1   | 1            | 0.3        | vii-mooij-2      | 2            | 0.3        | vii-mooij-2      | 2            | 0.3        |
| 3    | vii-mooij-2      | 2            | 0.3        | vii-williams-1   | 1            | 0.4        | vii-williams-1   | 1            | 0.4        |
| 4    | vii-verwer-1     | 2            | 0.8        | vii-verwer-1     | 2            | 1.0        | vii-verwer-1     | 2            | 1.2        |
| 5    | vii-verwer-2     | 0            | 1.2        | vii-verwer-2     | 0            | 1.4        | vii-verwer-2     | 0            | 1.7        |
| 6    | vii-verwer-3     | 0            | 1.3        | vii-lommerse-2   | 0            | 1.6        | vii-lommerse-2   | 0            | 1.7        |
| 7    | vii-lommerse-1   | 0            | 1.4        | vii-lommerse-1   | 0            | 1.6        | vii-lommerse-1   | 0            | 1.8        |
| 8    | vii-lommerse-2   | 0            | 1.4        | vii-verwer-3     | 0            | 1.7        | vii-verwer-3     | 0            | 2.0        |
| 9    | vii-motherwell-2 | 0            | 1.8        | vii-motherwell-2 | 0            | 2.1        | vii-motherwell-2 | 0            | 2.4        |
| 10   | vii-motherwell-1 | 0            | 2.0        | vii-motherwell-1 | 0            | 2.3        | vii-motherwell-1 | 0            | 2.7        |
| 11   | vii-lommerse-3   | 0            | 3.8        | vii-lommerse-3   | 0            | 4.2        | vii-lommerse-3   | 0            | 4.4        |

TABLE IX: Computed energy ranking for unique candidate structures of compound VIII, hydantoin. Energies are expressed relative to the experimental form, in kJ/mol.

| Rank           | GGA               |              |            | 25X               |              |            | 50X               |              |            |
|----------------|-------------------|--------------|------------|-------------------|--------------|------------|-------------------|--------------|------------|
|                | Structure         | # Duplicates | $\Delta E$ | Structure         | # Duplicates | $\Delta E$ | Structure         | # Duplicates | $\Delta E$ |
| sh maketable 1 | viii-expt         | 1            | 0.0        | viii-expt         | 1            | 0.0        | viii-expt         | 1            | 0.0        |
| 2              | viii-day-2        | 0            | 0.6        | viii-day-2        | 0            | 0.9        | viii-day-2        | 0            | 1.1        |
| 3              | viii-day-3        | 1            | 0.7        | viii-day-3        | 1            | 1.3        | viii-day-3        | 1            | 1.9        |
| 4              | viii-vaneijck-3   | 0            | 2.0        | viii-vaneijck-3   | 0            | 2.6        | viii-vaneijck-3   | 0            | 3.2        |
| 5              | viii-boerrigter-2 | 0            | 4.0        | viii-boerrigter-2 | 0            | 5.1        | viii-boerrigter-1 | 0            | 5.0        |
| 6              | viii-hofmann-2    | 1            | 6.4        | viii-boerrigter-1 | 0            | 6.0        | viii-liang-3      | 0            | 5.9        |
| 7              | viii-erk-1        | 0            | 6.7        | viii-erk-1        | 0            | 6.3        | viii-erk-1        | 0            | 5.9        |
| 8              | viii-boerrigter-1 | 0            | 7.2        | viii-liang-3      | 0            | 6.6        | viii-boerrigter-2 | 0            | 6.0        |
| 9              | viii-liang-3      | 0            | 7.6        | viii-hofmann-2    | 1            | 8.0        | viii-liang-2      | 1            | 8.4        |
| 10             | viii-liang-2      | 1            | 9.3        | viii-liang-2      | 1            | 8.8        | viii-valle-1      | 3            | 8.9        |
| 11             | viii-valle-2      | 3            | 9.6        | viii-valle-1      | 3            | 9.2        | viii-hofmann-2    | 1            | 9.6        |
| 12             | viii-valle-3      | 0            | 13.0       | viii-valle-3      | 0            | 14.5       | viii-valle-3      | 0            | 16.0       |

TABLE X: Computed energy ranking for unique candidate structures of compound IX, 2,9-diiodoanthanthrone. Energies are expressed relative to the experimental form, in kJ/mol.

| Rank | GGA              |              |            | 25X              |              |            | 50X              |              |            |
|------|------------------|--------------|------------|------------------|--------------|------------|------------------|--------------|------------|
|      | Structure        | # Duplicates | $\Delta E$ | Structure        | # Duplicates | $\Delta E$ | Structure        | # Duplicates | $\Delta E$ |
| 1    | ix-expt          | 1            | 0.0        | ix-expt          | 1            | 0.0        | ix-expt          | 1            | 0.0        |
| 2    | ix-day-3         | 1            | 5.7        | ix-vaneijck-3    | 1            | 5.9        | ix-vaneijck-3    | 1            | 5.6        |
| 3    | ix-vaneijck-3    | 1            | 6.4        | ix-day-3         | 1            | 6.2        | ix-day-3         | 1            | 6.4        |
| 4    | ix-valle-1       | 1            | 9.4        | ix-liang-1       | 1            | 8.7        | ix-liang-1       | 1            | 8.2        |
| 5    | ix-day-2         | 0            | 12.5       | ix-day-2         | 0            | 12.4       | ix-liang-2       | 0            | 11.9       |
| 6    | ix-liang-2       | 0            | 13.4       | ix-liang-2       | 0            | 12.6       | ix-day-2         | 0            | 12.2       |
| 7    | ix-boerrigter-3  | 0            | 13.4       | ix-boerrigter-3  | 0            | 13.2       | ix-boerrigter-3  | 0            | 13.0       |
| 8    | ix-liang-3       | 0            | 17.0       | ix-boerrigter-1  | 1            | 15.9       | ix-boerrigter-1  | 1            | 14.2       |
| 9    | ix-boerrigter-1  | 1            | 18.2       | ix-liang-3       | 0            | 16.4       | ix-liang-3       | 0            | 15.8       |
| 10   | ix-valle-2       | 0            | 19.4       | ix-valle-2       | 0            | 18.9       | ix-valle-2       | 0            | 18.7       |
| 11   | ix-hofmann-2     | 0            | 23.6       | ix-hofmann-1     | 1            | 21.9       | ix-hofmann-1     | 1            | 20.3       |
| 12   | ix-hofmann-3     | 1            | 23.9       | ix-hofmann-2     | 0            | 23.0       | ix-hofmann-2     | 0            | 22.6       |
| 13   | ix-motherwell-3  | 2            | 27.5       | ix-motherwell-1  | 2            | 26.5       | ix-vaneijck-2    | 1            | 25.4       |
| 14   | ix-vaneijck-2    | 1            | 28.4       | ix-vaneijck-2    | 1            | 26.7       | ix-motherwell-1  | 2            | 25.8       |
| 15   | ix-erk-3         | 0            | 28.6       | ix-erk-3         | 0            | 27.7       | ix-erk-3         | 0            | 27.3       |
| 16   | ix-dzyabchenko-1 | 0            | 30.4       | ix-dzyabchenko-1 | 0            | 29.7       | ix-dzyabchenko-1 | 0            | 28.3       |
| 17   | ix-erk-2         | 0            | 32.9       | ix-erk-2         | 0            | 32.1       | ix-erk-2         | 0            | 31.7       |
| 18   | ix-dzyabchenko-2 | 0            | 35.4       | ix-dzyabchenko-2 | 0            | 34.8       | ix-dzyabchenko-2 | 0            | 33.4       |

TABLE XI: Computed energy ranking for unique candidate structures of compound X, 2-acetamido-4,5,-dinitrotoluene. Energies are expressed relative to the experimental form, in kJ/mol.

| Rank | GGA             |              |            | 25X             |              |            | 50X             |              |            |
|------|-----------------|--------------|------------|-----------------|--------------|------------|-----------------|--------------|------------|
|      | Structure       | # Duplicates | $\Delta E$ | Structure       | # Duplicates | $\Delta E$ | Structure       | # Duplicates | $\Delta E$ |
| 1    | x-vaneijck-3    | 0            | -0.9       | x-vaneijck-3    | 0            | -0.4       | x-expt          | 0            | 0.0        |
| 2    | x-expt          | 0            | 0.0        | x-expt          | 0            | 0.0        | x-vaneijck-3    | 0            | 0.6        |
| 3    | x-dzyabchenko-3 | 1            | 2.1        | x-dzyabchenko-3 | 1            | 2.4        | x-dzyabchenko-3 | 1            | 2.6        |
| 4    | x-day-1         | 0            | 2.7        | x-ammon-2       | 0            | 3.3        | x-ammon-2       | 0            | 2.8        |
| 5    | x-day-2         | 0            | 2.8        | x-day-1         | 0            | 3.4        | x-dzyabchenko-2 | 0            | 3.1        |
| 6    | x-ammon-2       | 0            | 4.4        | x-day-2         | 0            | 3.5        | x-day-1         | 0            | 4.1        |
| 7    | x-dzyabchenko-2 | 0            | 4.4        | x-dzyabchenko-2 | 0            | 3.6        | x-day-2         | 0            | 4.5        |
| 8    | x-vaneijck-1    | 1            | 4.9        | x-vaneijck-1    | 1            | 5.7        | x-erk-2         | 0            | 6.6        |
| 9    | x-day-3         | 0            | 5.1        | x-erk-2         | 0            | 6.0        | x-ammon-3       | 1            | 6.7        |
| 10   | x-erk-2         | 0            | 5.2        | x-day-3         | 0            | 6.1        | x-day-3         | 0            | 7.2        |
| 11   | x-dzyabchenko-1 | 0            | 5.7        | x-dzyabchenko-1 | 0            | 7.0        | x-ammon-1       | 0            | 8.1        |
| 12   | x-ammon-1       | 0            | 9.4        | x-ammon-1       | 0            | 8.5        | x-dzyabchenko-1 | 0            | 8.1        |
| 13   | x-erk-1         | 0            | 9.5        | x-erk-1         | 0            | 9.3        | x-erk-1         | 0            | 9.7        |
| 14   | x-hofmann-2     | 0            | 12.5       | x-hofmann-3     | 0            | 13.7       | x-liang-1       | 0            | 14.2       |
| 15   | x-hofmann-3     | 0            | 12.7       | x-hofmann-2     | 0            | 13.7       | x-hofmann-3     | 0            | 14.4       |
| 16   | x-liang-1       | 0            | 13.9       | x-liang-1       | 0            | 13.9       | x-liang-2       | 0            | 14.7       |
| 17   | x-liang-2       | 0            | 14.3       | x-liang-2       | 0            | 14.3       | x-hofmann-2     | 0            | 14.9       |
| 18   | x-hofmann-1     | 0            | 15.6       | x-hofmann-1     | 0            | 17.2       | x-liang-3       | 0            | 18.5       |
| 19   | x-liang-3       | 0            | 17.5       | x-liang-3       | 0            | 18.1       | x-hofmann-1     | 0            | 18.6       |
| 20   | x-boerrigter-1  | 0            | 18.6       | x-boerrigter-1  | 0            | 22.2       | x-boerrigter-2  | 0            | 24.9       |
| 21   | x-boerrigter-2  | 0            | 19.3       | x-boerrigter-2  | 0            | 22.3       | x-boerrigter-1  | 0            | 26.3       |
| 22   | x-boerrigter-3  | 0            | 28.9       | x-boerrigter-3  | 0            | 31.3       | x-boerrigter-3  | 0            | 33.2       |

TABLE XII: Computed energy ranking for unique candidate structures of compound XI, azetidine. Energies are expressed relative to the experimental form, in kJ/mol.

| Rank | GGA              |              |            | 25X              |              |            | 50X              |              |            |
|------|------------------|--------------|------------|------------------|--------------|------------|------------------|--------------|------------|
|      | Structure        | # Duplicates | $\Delta E$ | Structure        | # Duplicates | $\Delta E$ | Structure        | # Duplicates | $\Delta E$ |
| 1    | xi-expt          | 0            | 0.0        | xi-expt          | 0            | 0.0        | xi-expt          | 0            | 0.0        |
| 2    | xi-liang-2       | 1            | 0.7        | xi-liang-2       | 1            | 0.5        | xi-liang-2       | 1            | 0.4        |
| 3    | xi-liang-1       | 0            | 0.7        | xi-liang-1       | 0            | 0.6        | xi-liang-1       | 0            | 0.5        |
| 4    | xi-boerrigter-3  | 0            | 0.7        | xi-liang-3       | 1            | 0.8        | xi-liang-3       | 1            | 0.8        |
| 5    | xi-vaneijck-3    | 0            | 0.8        | xi-boerrigter-3  | 0            | 0.8        | xi-valle-3       | 1            | 0.8        |
| 6    | xi-motherwell-2  | 1            | 0.9        | xi-vaneijck-3    | 0            | 0.9        | xi-boerrigter-2  | 0            | 0.9        |
| 7    | xi-boerrigter-2  | 0            | 1.2        | xi-boerrigter-2  | 0            | 1.0        | xi-vaneijck-3    | 0            | 0.9        |
| 8    | xi-ammon-1       | 2            | 1.5        | xi-valle-3       | 1            | 1.2        | xi-boerrigter-3  | 0            | 0.9        |
| 9    | xi-ammon-2       | 2            | 1.5        | xi-erk-3         | 0            | 1.5        | xi-erk-3         | 0            | 1.4        |
| 10   | xi-erk-2         | 0            | 1.5        | xi-day-2         | 2            | 1.6        | xi-dzyabchenko-3 | 0            | 1.5        |
| 11   | xi-valle-3       | 1            | 1.6        | xi-ammon-3       | 0            | 1.7        | xi-ammon-3       | 0            | 1.6        |
| 12   | xi-erk-3         | 0            | 1.6        | xi-ammon-1       | 2            | 1.7        | xi-day-2         | 2            | 1.7        |
| 13   | xi-vaneijck-2    | 0            | 1.7        | xi-vaneijck-2    | 0            | 1.7        | xi-erk-1         | 1            | 1.8        |
| 14   | xi-ammon-3       | 0            | 1.8        | xi-erk-2         | 0            | 1.8        | xi-vaneijck-2    | 0            | 1.8        |
| 15   | xi-motherwell-3  | 0            | 1.9        | xi-motherwell-3  | 0            | 1.9        | xi-ammon-1       | 2            | 1.9        |
| 16   | xi-erk-1         | 1            | 2.1        | xi-erk-1         | 1            | 2.0        | xi-motherwell-3  | 0            | 1.9        |
| 17   | xi-dzyabchenko-3 | 0            | 2.6        | xi-dzyabchenko-3 | 0            | 2.1        | xi-erk-2         | 0            | 1.9        |
| 18   | xi-valle-1       | 0            | 6.3        | xi-valle-1       | 0            | 5.2        | xi-valle-1       | 0            | 4.3        |
| 19   | xi-hofmann-3     | 0            | 10.1       | xi-hofmann-3     | 0            | 8.8        | xi-hofmann-3     | 0            | 7.8        |
| 20   | xi-hofmann-1     | 0            | 10.2       | xi-hofmann-1     | 0            | 9.4        | xi-hofmann-2     | 0            | 8.8        |
| 21   | xi-hofmann-2     | 0            | 10.9       | xi-hofmann-2     | 0            | 9.6        | xi-hofmann-1     | 0            | 8.9        |
| 22   | xi-day-3         | 0            | 33.6       | xi-day-3         | 0            | 37.5       | xi-day-3         | 0            | 41.8       |

TABLE XIII: Computed energy ranking for unique candidate structures of compound XII, 2-propenal. Energies are expressed relative to the experimental form, in kJ/mol.

| Rank | GGA              |              |            | 25X              |              |            | 50X              |              |            |
|------|------------------|--------------|------------|------------------|--------------|------------|------------------|--------------|------------|
|      | Structure        | # Duplicates | $\Delta E$ | Structure        | # Duplicates | $\Delta E$ | Structure        | # Duplicates | $\Delta E$ |
| 1    | xii-expt         | 3            | 0.0        | xii-expt         | 3            | 0.0        | xii-expt         | 3            | 0.0        |
| 2    | xii-neumann-2    | 1            | 1.3        | xii-neumann-2    | 1            | 1.2        | xii-ammon-3      | 0            | 1.2        |
| 3    | xii-day-1        | 0            | 1.7        | xii-ammon-3      | 0            | 1.7        | xii-price-3      | 1            | 1.3        |
| 4    | xii-neumann-3    | 0            | 1.8        | xii-scheraga-3   | 1            | 1.7        | xii-scheraga-3   | 1            | 1.4        |
| 5    | xii-boerrigter-2 | 0            | 2.2        | xii-day-1        | 0            | 1.7        | xii-day-1        | 0            | 1.7        |
| 6    | xii-day-2        | 0            | 2.2        | xii-neumann-3    | 0            | 1.7        | xii-neumann-3    | 0            | 1.9        |
| 7    | xii-price-2      | 0            | 2.2        | xii-price-2      | 0            | 1.9        | xii-price-2      | 0            | 1.9        |
| 8    | xii-ammon-3      | 0            | 2.3        | xii-boerrigter-2 | 0            | 1.9        | xii-boerrigter-2 | 0            | 1.9        |
| 9    | xii-scheraga-3   | 1            | 2.3        | xii-day-2        | 0            | 2.3        | xii-day-2        | 0            | 2.6        |
| 10   | xii-price-1      | 2            | 2.3        | xii-price-1      | 2            | 2.6        | xii-jose-3       | 0            | 2.9        |
| 11   | xii-schmidt-3    | 0            | 2.6        | xii-schmidt-3    | 0            | 2.9        | xii-price-1      | 2            | 3.0        |
| 12   | xii-jose-3       | 0            | 3.3        | xii-jose-3       | 0            | 3.0        | xii-schmidt-3    | 0            | 3.0        |
| 13   | xii-valle-2      | 0            | 3.4        | xii-valle-2      | 0            | 3.2        | xii-valle-2      | 0            | 3.1        |
| 14   | xii-vaneijck-2   | 1            | 3.7        | xii-boerrigter-3 | 1            | 3.6        | xii-boerrigter-3 | 1            | 3.7        |
| 15   | xii-day-3        | 0            | 3.8        | xii-day-3        | 0            | 4.0        | xii-vaneijck-1   | 2            | 3.8        |
| 16   | xii-schmidt-2    | 0            | 4.4        | xii-vaneijck-1   | 2            | 4.1        | xii-schmidt-2    | 0            | 4.0        |
| 17   | xii-vaneijck-1   | 2            | 4.4        | xii-schmidt-2    | 0            | 4.2        | xii-day-3        | 0            | 4.5        |
| 18   | xii-schweizer-3  | 0            | 4.7        | xii-schmidt-1    | 0            | 4.8        | xii-schmidt-1    | 0            | 4.7        |
| 19   | xii-jose-2       | 0            | 4.7        | xii-schweizer-3  | 0            | 5.2        | xii-jose-2       | 0            | 5.8        |
| 20   | xii-schmidt-1    | 0            | 5.0        | xii-jose-2       | 0            | 5.2        | xii-schweizer-3  | 0            | 5.8        |
| 21   | xii-valle-3      | 0            | 7.3        | xii-valle-3      | 0            | 7.1        | xii-valle-3      | 0            | 7.4        |
| 22   | xii-jose-1       | 0            | 7.9        | xii-jose-1       | 0            | 8.1        | xii-jose-1       | 0            | 8.4        |
| 23   | xii-hofmann-1    | 0            | 8.2        | xii-hofmann-1    | 0            | 8.4        | xii-hofmann-1    | 0            | 8.6        |
| 24   | xii-hofmann-2    | 0            | 9.1        | xii-hofmann-2    | 0            | 9.7        | xii-hofmann-2    | 0            | 9.7        |
| 25   | xii-hofmann-3    | 0            | 10.6       | xii-hofmann-3    | 0            | 10.3       | xii-hofmann-3    | 0            | 10.4       |
| 26   | xii-facelli-3    | 0            | 12.2       | xii-facelli-3    | 0            | 12.0       | xii-facelli-3    | 0            | 12.1       |
| 27   | xii-facelli-1    | 0            | 12.3       | xii-facelli-1    | 0            | 12.2       | xii-facelli-1    | 0            | 12.4       |

TABLE XIV: Computed energy ranking for unique candidate structures of compound XIII, 1,3-dibromo-2-chloro-5-fluorobenzene. Energies are expressed relative to the experimental form, in kJ/mol.

| Rank           | GGA               |              |            | 25X               |              |            | 50X               |              |            |
|----------------|-------------------|--------------|------------|-------------------|--------------|------------|-------------------|--------------|------------|
|                | Structure         | # Duplicates | $\Delta E$ | Structure         | # Duplicates | $\Delta E$ | Structure         | # Duplicates | $\Delta E$ |
| sh maketable 1 | xiii-expt         | 1            | 0.0        | xiii-expt         | 1            | 0.0        | xiii-expt         | 1            | 0.0        |
| 2              | xiii-neumann-3    | 1            | 1.2        | xiii-neumann-2    | 0            | 1.2        | xiii-neumann-2    | 0            | 1.2        |
| 3              | xiii-neumann-2    | 0            | 1.3        | xiii-neumann-3    | 1            | 2.3        | xiii-neumann-3    | 1            | 3.0        |
| 4              | xiii-price-2      | 0            | 3.9        | xiii-price-2      | 0            | 3.3        | xiii-price-2      | 0            | 3.1        |
| 5              | xiii-day-2        | 0            | 4.8        | xiii-ammon-3      | 0            | 5.1        | xiii-ammon-3      | 0            | 5.4        |
| 6              | xiii-ammon-3      | 0            | 5.1        | xiii-day-2        | 0            | 5.6        | xiii-schweizer-3  | 0            | 6.0        |
| 7              | xiii-scheraga-2   | 3            | 5.6        | xiii-scheraga-2   | 3            | 5.9        | xiii-scheraga-2   | 3            | 6.4        |
| 8              | xiii-boerrigter-3 | 0            | 6.3        | xiii-schweizer-3  | 0            | 6.3        | xiii-facelli-1    | 0            | 6.4        |
| 9              | xiii-boerrigter-2 | 1            | 6.8        | xiii-boerrigter-3 | 0            | 6.5        | xiii-boerrigter-2 | 1            | 6.4        |
| 10             | xiii-schweizer-3  | 0            | 6.9        | xiii-boerrigter-2 | 1            | 6.6        | xiii-boerrigter-3 | 0            | 6.6        |
| 11             | xiii-facelli-1    | 0            | 7.2        | xiii-facelli-1    | 0            | 6.7        | xiii-day-2        | 0            | 6.6        |
| 12             | xiii-schweizer-2  | 0            | 7.3        | xiii-schweizer-2  | 0            | 7.1        | xiii-schweizer-2  | 0            | 7.3        |
| 13             | xiii-day-3        | 0            | 7.4        | xiii-desiraju-1   | 5            | 7.5        | xiii-desiraju-1   | 5            | 7.8        |
| 14             | xiii-facelli-2    | 5            | 7.4        | xiii-day-3        | 0            | 7.7        | xiii-day-3        | 0            | 8.3        |
| 15             | xiii-hofmann-1    | 1            | 8.5        | xiii-hofmann-1    | 1            | 8.4        | xiii-hofmann-1    | 1            | 8.6        |
| 16             | xiii-desiraju-3   | 0            | 8.7        | xiii-desiraju-3   | 0            | 9.1        | xiii-desiraju-3   | 0            | 9.6        |
| 17             | xiii-jose-1       | 1            | 9.2        | xiii-jose-1       | 1            | 9.6        | xiii-jose-1       | 1            | 10.3       |
| 18             | xiii-facelli-3    | 0            | 10.1       | xiii-facelli-3    | 0            | 10.4       | xiii-facelli-3    | 0            | 10.8       |
| 19             | xiii-valle-2      | 1            | 12.4       | xiii-valle-2      | 1            | 12.2       | xiii-valle-2      | 1            | 12.5       |
| 20             | xiii-hofmann-2    | 0            | 13.2       | xiii-hofmann-2    | 0            | 14.0       | xiii-hofmann-2    | 0            | 15.1       |
| 21             | xiii-vaneijck-3   | 0            | 13.6       | xiii-vaneijck-1   | 1            | 14.6       | xiii-vaneijck-1   | 1            | 15.6       |
| 22             | xiii-vaneijck-1   | 1            | 13.7       | xiii-vaneijck-3   | 0            | 14.7       | xiii-vaneijck-3   | 0            | 15.9       |
| 23             | xiii-jose-2       | 0            | 16.1       | xiii-jose-2       | 0            | 17.4       | xiii-jose-2       | 0            | 18.8       |



TABLE XV: Computed energy ranking for unique candidate structures of compound XIV, N-(dimethylthiocarbamoyl)benzothiazole-2-thione. Energies are expressed relative to the experimental form, in kJ/mol.

| Rank | GGA              |              |            | 25X              |              |            | 50X              |              |            |
|------|------------------|--------------|------------|------------------|--------------|------------|------------------|--------------|------------|
|      | Structure        | # Duplicates | $\Delta E$ | Structure        | # Duplicates | $\Delta E$ | Structure        | # Duplicates | $\Delta E$ |
| 1    | xiv-expt         | 1            | 0.0        | xiv-expt         | 1            | 0.0        | xiv-expt         | 1            | 0.0        |
| 2    | xiv-kendrick-2   | 0            | 3.2        | xiv-kendrick-3   | 0            | 4.3        | xiv-kendrick-3   | 0            | 4.4        |
| 3    | xiv-price-3      | 1            | 3.8        | xiv-kendrick-2   | 0            | 4.5        | xiv-kendrick-2   | 0            | 5.2        |
| 4    | xiv-kendrick-3   | 0            | 4.1        | xiv-price-3      | 1            | 4.5        | xiv-price-3      | 1            | 5.2        |
| 5    | xiv-vaneijck-2   | 4            | 6.6        | xiv-schmidt-2    | 4            | 6.4        | xiv-schmidt-2    | 4            | 5.8        |
| 6    | xiv-ammon-3      | 0            | 6.8        | xiv-scheraga-1   | 1            | 6.7        | xiv-scheraga-1   | 1            | 6.2        |
| 7    | xiv-scheraga-1   | 1            | 6.8        | xiv-ammon-3      | 0            | 7.5        | xiv-ammon-3      | 0            | 7.7        |
| 8    | xiv-facelli-3    | 0            | 7.2        | xiv-facelli-3    | 0            | 7.9        | xiv-facelli-3    | 0            | 8.4        |
| 9    | xiv-schmidt-1    | 1            | 9.8        | xiv-facelli-1    | 1            | 10.1       | xiv-facelli-1    | 1            | 9.8        |
| 10   | xiv-facelli-1    | 1            | 10.2       | xiv-facelli-2    | 2            | 10.1       | xiv-facelli-2    | 2            | 9.8        |
| 11   | xiv-facelli-2    | 2            | 10.2       | xiv-scheraga-2   | 1            | 10.9       | xiv-scheraga-2   | 1            | 11.0       |
| 12   | xiv-scheraga-2   | 1            | 10.5       | xiv-schmidt-1    | 1            | 11.1       | xiv-schmidt-1    | 1            | 11.7       |
| 13   | xiv-price-2      | 0            | 11.5       | xiv-boerrigter-3 | 0            | 13.0       | xiv-boerrigter-3 | 0            | 12.2       |
| 14   | xiv-boerrigter-3 | 0            | 13.3       | xiv-price-2      | 0            | 13.1       | xiv-hofmann-1    | 1            | 13.6       |
| 15   | xiv-schmidt-3    | 1            | 14.5       | xiv-hofmann-1    | 1            | 14.2       | xiv-price-2      | 0            | 14.2       |
| 16   | xiv-desiraju-2   | 0            | 17.7       | xiv-desiraju-2   | 0            | 18.5       | xiv-desiraju-2   | 0            | 18.7       |
| 17   | xiv-jose-2       | 0            | 17.9       | xiv-jose-2       | 0            | 19.6       | xiv-jose-2       | 0            | 20.5       |
| 18   | xiv-jose-3       | 0            | 22.6       | xiv-jose-3       | 0            | 24.4       | xiv-jose-3       | 0            | 25.1       |
| 19   | xiv-desiraju-3   | 0            | 25.5       | xiv-desiraju-3   | 0            | 27.8       | xiv-desiraju-3   | 0            | 29.4       |
| 20   | xiv-desiraju-1   | 0            | 25.6       | xiv-hofmann-2    | 0            | 28.4       | xiv-hofmann-2    | 0            | 30.1       |
| 21   | xiv-hofmann-2    | 0            | 26.1       | xiv-desiraju-1   | 0            | 29.0       | xiv-desiraju-1   | 0            | 31.5       |
| 22   | xiv-jose-1       | 0            | 33.3       | xiv-jose-1       | 0            | 36.6       | xiv-jose-1       | 0            | 39.0       |

TABLE XVI: Computed energy ranking for unique candidate structures of compound XV, 2-amino-4-methylpyrimidine:2-methylbenzoic acid. Energies are expressed relative to the experimental form, in kJ/mol.

| Rank | GGA             |              |            | 25X             |              |            | 50X             |              |            |
|------|-----------------|--------------|------------|-----------------|--------------|------------|-----------------|--------------|------------|
|      | Structure       | # Duplicates | $\Delta E$ | Structure       | # Duplicates | $\Delta E$ | Structure       | # Duplicates | $\Delta E$ |
| 1    | xv-ammon-1      | 2            | -0.3       | xv-ammon-1      | 2            | -0.8       | xv-desiraju-3   | 2            | -1.2       |
| 2    | xv-expt         | 1            | 0.0        | xv-expt         | 1            | 0.0        | xv-expt         | 1            | 0.0        |
| 3    | xv-neumann-2    | 0            | 1.9        | xv-neumann-2    | 0            | 2.9        | xv-schmidt-1    | 1            | 3.6        |
| 4    | xv-neumann-3    | 0            | 2.5        | xv-neumann-3    | 0            | 3.6        | xv-neumann-2    | 0            | 4.0        |
| 5    | xv-desiraju-2   | 0            | 4.1        | xv-schmidt-1    | 1            | 3.6        | xv-neumann-3    | 0            | 4.7        |
| 6    | xv-ammon-2      | 1            | 4.1        | xv-desiraju-2   | 0            | 4.3        | xv-desiraju-2   | 0            | 4.8        |
| 7    | xv-price-2      | 1            | 5.0        | xv-day-2        | 0            | 5.2        | xv-day-2        | 0            | 5.7        |
| 8    | xv-day-2        | 0            | 5.1        | xv-price-2      | 1            | 5.6        | xv-price-2      | 1            | 6.6        |
| 9    | xv-day-3        | 0            | 6.7        | xv-day-3        | 0            | 6.8        | xv-boerrigter-1 | 0            | 7.2        |
| 10   | xv-boerrigter-1 | 0            | 7.4        | xv-boerrigter-1 | 0            | 7.1        | xv-day-3        | 0            | 7.4        |
| 11   | xv-schmidt-3    | 0            | 8.1        | xv-facelli-3    | 0            | 7.6        | xv-facelli-3    | 0            | 7.5        |
| 12   | xv-price-3      | 0            | 8.2        | xv-schmidt-3    | 0            | 8.3        | xv-schmidt-3    | 0            | 9.1        |
| 13   | xv-facelli-3    | 0            | 8.3        | xv-price-3      | 0            | 8.8        | xv-valle-2      | 0            | 9.3        |
| 14   | xv-ammon-3      | 0            | 9.6        | xv-valle-2      | 0            | 9.6        | xv-price-3      | 0            | 9.8        |
| 15   | xv-price-1      | 0            | 9.7        | xv-facelli-2    | 0            | 10.2       | xv-facelli-2    | 0            | 10.0       |
| 16   | xv-boerrigter-3 | 0            | 9.7        | xv-boerrigter-3 | 0            | 10.3       | xv-schweizer-3  | 0            | 10.8       |
| 17   | xv-boerrigter-2 | 0            | 10.0       | xv-ammon-3      | 0            | 10.3       | xv-boerrigter-3 | 0            | 10.8       |
| 18   | xv-facelli-2    | 0            | 10.7       | xv-price-1      | 0            | 10.3       | xv-ammon-3      | 0            | 10.8       |
| 19   | xv-valle-2      | 0            | 10.8       | xv-valle-1      | 0            | 11.2       | xv-price-1      | 0            | 11.0       |
| 20   | xv-desiraju-1   | 0            | 11.3       | xv-boerrigter-2 | 0            | 11.3       | xv-valle-1      | 0            | 11.4       |
| 21   | xv-valle-1      | 0            | 11.8       | xv-schweizer-3  | 0            | 11.3       | xv-schweizer-1  | 0            | 11.4       |
| 22   | xv-schweizer-3  | 0            | 12.6       | xv-desiraju-1   | 0            | 11.4       | xv-desiraju-1   | 0            | 12.0       |
| 23   | xv-schweizer-1  | 0            | 12.7       | xv-schweizer-1  | 0            | 11.8       | xv-boerrigter-2 | 0            | 12.3       |
| 24   | xv-facelli-1    | 0            | 14.1       | xv-facelli-1    | 0            | 13.5       | xv-facelli-1    | 0            | 13.2       |
| 25   | xv-valle-3      | 0            | 15.2       | xv-schweizer-2  | 0            | 15.2       | xv-valle-3      | 0            | 15.4       |
| 26   | xv-schweizer-2  | 0            | 15.5       | xv-valle-3      | 0            | 15.3       | xv-schweizer-2  | 0            | 15.5       |
| 27   | xv-jose-3       | 0            | 68.2       | xv-jose-3       | 0            | 69.4       | xv-jose-3       | 0            | 71.2       |

TABLE XVII: Computed energy ranking for unique candidate structures of compound XVI, 2-diazo-3,5-cyclohexadiene-2-one. Energies are expressed relative to the experimental form, in kJ/mol.

| Rank | GGA              |              |            | 25X              |              |            | 50X              |              |            |
|------|------------------|--------------|------------|------------------|--------------|------------|------------------|--------------|------------|
|      | Structure        | # Duplicates | $\Delta E$ | Structure        | # Duplicates | $\Delta E$ | Structure        | # Duplicates | $\Delta E$ |
| 1    | xvi-expt         | 2            | 0.0        | xvi-expt         | 2            | 0.0        | xvi-expt         | 2            | 0.0        |
| 2    | xvi-neumann-2    | 1            | 0.8        | xvi-scheraga-2   | 1            | 0.8        | xvi-scheraga-2   | 1            | 0.9        |
| 3    | xvi-misquitta-1  | 1            | 0.9        | xvi-day-3        | 0            | 2.6        | xvi-day-3        | 0            | 2.8        |
| 4    | xvi-desiraju-2   | 1            | 1.6        | xvi-price-3      | 1            | 3.1        | xvi-vaneijck-3   | 2            | 4.1        |
| 5    | xvi-day-3        | 0            | 2.9        | xvi-day-2        | 0            | 3.7        | xvi-day-2        | 0            | 4.4        |
| 6    | xvi-day-2        | 0            | 3.3        | xvi-neumann-3    | 1            | 3.8        | xvi-facelli-2    | 1            | 4.7        |
| 7    | xvi-boerrigter-3 | 0            | 3.5        | xvi-vaneijck-3   | 2            | 4.3        | xvi-price-3      | 1            | 4.8        |
| 8    | xvi-facelli-1    | 0            | 4.3        | xvi-facelli-2    | 1            | 4.5        | xvi-price-1      | 1            | 5.5        |
| 9    | xvi-ammon-3      | 1            | 4.6        | xvi-boerrigter-3 | 0            | 5.0        | xvi-neumann-3    | 1            | 5.6        |
| 10   | xvi-vaneijck-3   | 2            | 4.8        | xvi-price-1      | 1            | 5.0        | xvi-desiraju-1   | 0            | 5.8        |
| 11   | xvi-desiraju-1   | 0            | 4.9        | xvi-desiraju-1   | 0            | 5.1        | xvi-misquitta-3  | 0            | 6.5        |
| 12   | xvi-misquitta-3  | 0            | 4.9        | xvi-misquitta-3  | 0            | 5.4        | xvi-boerrigter-3 | 0            | 6.8        |
| 13   | xvi-vaneijck-1   | 1            | 4.9        | xvi-facelli-1    | 0            | 5.8        | xvi-boerrigter-2 | 1            | 6.8        |
| 14   | xvi-boerrigter-2 | 1            | 5.4        | xvi-boerrigter-2 | 1            | 5.9        | xvi-desiraju-3   | 0            | 6.9        |
| 15   | xvi-desiraju-3   | 0            | 5.7        | xvi-desiraju-3   | 0            | 6.0        | xvi-facelli-1    | 0            | 7.2        |
| 16   | xvi-boerrigter-1 | 0            | 6.5        | xvi-facelli-3    | 0            | 7.7        | xvi-facelli-3    | 0            | 8.5        |
| 17   | xvi-facelli-3    | 0            | 7.1        | xvi-boerrigter-1 | 0            | 7.8        | xvi-boerrigter-1 | 0            | 9.1        |
| 18   | xvi-maleev-1     | 0            | 7.7        | xvi-maleev-1     | 0            | 8.9        | xvi-maleev-1     | 0            | 10.3       |
| 19   | xvi-valle-3      | 0            | 8.8        | xvi-hofmann-2    | 1            | 10.3       | xvi-hofmann-2    | 1            | 11.1       |
| 20   | xvi-hofmann-2    | 1            | 10.1       | xvi-hofmann-3    | 0            | 11.6       | xvi-hofmann-3    | 0            | 12.7       |
| 21   | xvi-hofmann-3    | 0            | 11.2       | xvi-valle-3      | 0            | 12.2       | xvi-valle-3      | 0            | 14.8       |
| 22   | xvi-nikylov-1    | 0            | 11.3       | xvi-nikylov-3    | 0            | 13.3       | xvi-nikylov-3    | 0            | 15.3       |
| 23   | xvi-nikylov-3    | 0            | 11.4       | xvi-nikylov-2    | 0            | 14.2       | xvi-nikylov-2    | 0            | 16.8       |
| 24   | xvi-nikylov-2    | 0            | 11.7       | xvi-nikylov-1    | 0            | 14.5       | xvi-nikylov-1    | 0            | 17.2       |
| 25   | xvi-valle-1      | 0            | 17.8       | xvi-valle-1      | 0            | 21.7       | xvi-valle-2      | 0            | 24.6       |
| 26   | xvi-maleev-2     | 0            | 20.6       | xvi-maleev-2     | 0            | 23.0       | xvi-valle-1      | 0            | 25.2       |
| 27   | xvi-hofmann-1    | 0            | 22.1       | xvi-valle-2      | 0            | 23.9       | xvi-maleev-2     | 0            | 25.4       |
| 28   | xvi-valle-2      | 0            | 23.6       | xvi-hofmann-1    | 0            | 24.7       | xvi-hofmann-1    | 0            | 27.4       |

TABLE XVIII: Computed energy ranking for unique candidate structures of compound XVII, 1,2-dichloro4,5-dinitrobenzene. Energies are expressed relative to the experimental form, in kJ/mol.

| Rank | GGA               |              |            | 25X               |              |            | 50X               |              |            |
|------|-------------------|--------------|------------|-------------------|--------------|------------|-------------------|--------------|------------|
|      | Structure         | # Duplicates | $\Delta E$ | Structure         | # Duplicates | $\Delta E$ | Structure         | # Duplicates | $\Delta E$ |
| 1    | xvii-expt         | 2            | 0.0        | xvii-expt         | 2            | 0.0        | xvii-expt         | 2            | 0.0        |
| 2    | xvii-neumann-2    | 0            | 1.5        | xvii-neumann-2    | 0            | 1.9        | xvii-neumann-3    | 1            | 2.2        |
| 3    | xvii-day-2        | 1            | 1.8        | xvii-neumann-3    | 1            | 2.0        | xvii-neumann-2    | 0            | 2.3        |
| 4    | xvii-price-3      | 0            | 2.6        | xvii-price-3      | 0            | 2.5        | xvii-price-3      | 0            | 2.7        |
| 5    | xvii-vaneijck-3   | 2            | 2.9        | xvii-desiraju-2   | 2            | 2.6        | xvii-desiraju-2   | 2            | 2.8        |
| 6    | xvii-price-1      | 5            | 3.1        | xvii-day-1        | 5            | 2.7        | xvii-day-1        | 5            | 2.9        |
| 7    | xvii-day-3        | 2            | 3.5        | xvii-vaneijck-2   | 2            | 3.5        | xvii-vaneijck-2   | 2            | 3.8        |
| 8    | xvii-facelli-1    | 2            | 4.6        | xvii-facelli-1    | 2            | 4.5        | xvii-facelli-1    | 2            | 4.6        |
| 9    | xvii-ammon-1      | 0            | 4.6        | xvii-ammon-1      | 0            | 5.0        | xvii-boerrigter-2 | 0            | 5.5        |
| 10   | xvii-boerrigter-2 | 0            | 5.1        | xvii-boerrigter-2 | 0            | 5.1        | xvii-ammon-1      | 0            | 5.6        |
| 11   | xvii-scheraga-3   | 0            | 6.4        | xvii-scheraga-3   | 0            | 7.2        | xvii-facelli-2    | 0            | 7.5        |
| 12   | xvii-valle-1      | 0            | 6.6        | xvii-facelli-2    | 0            | 7.3        | xvii-scheraga-3   | 0            | 8.2        |
| 13   | xvii-facelli-2    | 0            | 6.8        | xvii-valle-1      | 0            | 7.4        | xvii-ammon-2      | 0            | 8.3        |
| 14   | xvii-ammon-2      | 0            | 7.1        | xvii-ammon-2      | 0            | 7.8        | xvii-valle-1      | 0            | 8.4        |
| 15   | xvii-hofmann-3    | 0            | 9.9        | xvii-hofmann-3    | 0            | 10.1       | xvii-hofmann-3    | 0            | 10.3       |
| 16   | xvii-valle-2      | 0            | 9.9        | xvii-valle-2      | 0            | 10.8       | xvii-boerrigter-3 | 0            | 11.5       |
| 17   | xvii-boerrigter-3 | 0            | 10.5       | xvii-boerrigter-3 | 0            | 10.9       | xvii-valle-2      | 0            | 11.7       |
| 18   | xvii-maleev-1     | 0            | 13.3       | xvii-maleev-1     | 0            | 14.8       | xvii-valle-3      | 0            | 16.5       |
| 19   | xvii-valle-3      | 0            | 13.3       | xvii-valle-3      | 0            | 15.1       | xvii-maleev-1     | 0            | 16.6       |
| 20   | xvii-maleev-3     | 0            | 20.2       | xvii-maleev-3     | 0            | 22.0       | xvii-maleev-3     | 0            | 24.0       |
| 21   | xvii-hofmann-2    | 1            | 28.6       | xvii-hofmann-2    | 1            | 30.5       | xvii-hofmann-2    | 1            | 32.1       |

TABLE XIX: Computed energy ranking for unique candidate structures of compound XVIII, (1-((4-chlorophenyl)sulfonyl)-2-oxopropylidene)diazenium. Energies are expressed relative to the experimental form, in kJ/mol.

| Rank | GGA                |              |            | 25X                |              |            | 50X                |              |            |
|------|--------------------|--------------|------------|--------------------|--------------|------------|--------------------|--------------|------------|
|      | Structure          | # Duplicates | $\Delta E$ | Structure          | # Duplicates | $\Delta E$ | Structure          | # Duplicates | $\Delta E$ |
| 1    | xviii-expt         | 1            | 0.0        | xviii-expt         | 1            | 0.0        | xviii-expt         | 1            | 0.0        |
| 2    | xviii-kendrick-3   | 0            | 1.2        | xviii-kendrick-2   | 0            | 0.9        | xviii-kendrick-2   | 0            | 0.7        |
| 3    | xviii-kendrick-2   | 0            | 1.2        | xviii-ammon-1      | 5            | 2.7        | xviii-ammon-1      | 5            | 3.4        |
| 4    | xviii-ammon-1      | 5            | 1.9        | xviii-kendrick-3   | 0            | 3.0        | xviii-vaneijck-1   | 0            | 4.1        |
| 5    | xviii-day-3        | 0            | 2.7        | xviii-day-3        | 0            | 3.8        | xviii-day-3        | 0            | 5.0        |
| 6    | xviii-price-3      | 0            | 3.9        | xviii-price-3      | 0            | 5.0        | xviii-kendrick-3   | 0            | 5.1        |
| 7    | xviii-scheraga-3   | 0            | 6.4        | xviii-vaneijck-1   | 0            | 6.0        | xviii-price-1      | 0            | 5.6        |
| 8    | xviii-orendt-2     | 0            | 6.4        | xviii-price-1      | 0            | 6.6        | xviii-vaneijck-3   | 0            | 6.1        |
| 9    | xviii-desiraju-2   | 1            | 6.5        | xviii-orendt-2     | 0            | 7.2        | xviii-price-3      | 0            | 6.2        |
| 10   | xviii-boerrigter-2 | 0            | 7.1        | xviii-desiraju-2   | 1            | 7.3        | xviii-orendt-2     | 0            | 8.0        |
| 11   | xviii-scheraga-2   | 0            | 7.2        | xviii-vaneijck-3   | 0            | 7.6        | xviii-desiraju-2   | 1            | 8.1        |
| 12   | xviii-ammon-2      | 0            | 7.8        | xviii-scheraga-3   | 0            | 7.6        | xviii-venuti-3     | 0            | 8.8        |
| 13   | xviii-day-2        | 0            | 7.8        | xviii-venuti-3     | 0            | 8.5        | xviii-scheraga-3   | 0            | 9.0        |
| 14   | xviii-boerrigter-1 | 0            | 7.9        | xviii-day-2        | 0            | 8.5        | xviii-price-2      | 0            | 9.2        |
| 15   | xviii-orendt-3     | 0            | 9.2        | xviii-boerrigter-2 | 0            | 8.6        | xviii-vaneijck-2   | 0            | 9.2        |
| 16   | xviii-vaneijck-1   | 0            | 9.3        | xviii-boerrigter-1 | 0            | 9.1        | xviii-day-2        | 0            | 9.3        |
| 17   | xviii-price-1      | 0            | 9.3        | xviii-price-2      | 0            | 9.2        | xviii-venuti-1     | 0            | 9.4        |
| 18   | xviii-venuti-3     | 0            | 9.7        | xviii-ammon-2      | 0            | 9.3        | xviii-boerrigter-2 | 0            | 10.0       |
| 19   | xviii-maleev-2     | 0            | 10.1       | xviii-scheraga-2   | 0            | 9.4        | xviii-boerrigter-1 | 0            | 10.4       |
| 20   | xviii-vaneijck-3   | 0            | 10.8       | xviii-venuti-1     | 0            | 9.7        | xviii-ammon-2      | 0            | 10.6       |
| 21   | xviii-price-2      | 0            | 11.0       | xviii-vaneijck-2   | 0            | 10.8       | xviii-scheraga-2   | 0            | 11.4       |
| 22   | xviii-desiraju-3   | 0            | 11.1       | xviii-maleev-2     | 0            | 11.5       | xviii-maleev-2     | 0            | 13.2       |
| 23   | xviii-venuti-1     | 0            | 11.4       | xviii-orendt-3     | 0            | 11.6       | xviii-orendt-3     | 0            | 14.1       |
| 24   | xviii-maleev-1     | 0            | 12.5       | xviii-desiraju-3   | 0            | 12.9       | xviii-maleev-1     | 0            | 14.2       |
| 25   | xviii-vaneijck-2   | 0            | 13.9       | xviii-maleev-1     | 0            | 13.4       | xviii-desiraju-3   | 0            | 14.5       |
| 26   | xviii-maleev-3     | 0            | 15.2       | xviii-maleev-3     | 0            | 17.6       | xviii-hofmann-2    | 0            | 17.1       |
| 27   | xviii-hofmann-2    | 0            | 21.4       | xviii-hofmann-2    | 0            | 18.5       | xviii-maleev-3     | 0            | 19.5       |
| 28   | xviii-venuti-2     | 0            | 27.8       | xviii-venuti-2     | 0            | 27.5       | xviii-venuti-2     | 0            | 28.3       |
| 29   | xviii-hofmann-3    | 0            | 33.7       | xviii-hofmann-3    | 0            | 32.5       | xviii-hofmann-3    | 0            | 32.9       |
| 30   | xviii-hofmann-1    | 0            | 40.1       | xviii-hofmann-1    | 0            | 38.8       | xviii-hofmann-1    | 0            | 39.3       |

TABLE XX: Computed energy ranking for unique candidate structures of compound XIX, 1,8-naphthyridinium fumarate. Energies are expressed relative to the experimental form, in kJ/mol.

| Rank | GGA              |              |            | 25X              |              |            | 50X              |              |            |
|------|------------------|--------------|------------|------------------|--------------|------------|------------------|--------------|------------|
|      | Structure        | # Duplicates | $\Delta E$ | Structure        | # Duplicates | $\Delta E$ | Structure        | # Duplicates | $\Delta E$ |
| 1    | xix-neumann-1    | 0            | -4.3       | xix-neumann-1    | 0            | -2.2       | xix-neumann-1    | 0            | -0.1       |
| 2    | xix-neumann-2    | 0            | -4.0       | xix-neumann-2    | 0            | -1.7       | xix-expt         | 2            | 0.0        |
| 3    | xix-price-1      | 1            | -2.6       | xix-day-1        | 1            | -0.3       | xix-neumann-2    | 0            | 0.5        |
| 4    | xix-day-2        | 0            | -1.1       | xix-expt         | 2            | 0.0        | xix-vaneijck-1   | 0            | 1.8        |
| 5    | xix-facelli-3    | 0            | -0.2       | xix-vaneijck-1   | 0            | 1.0        | xix-boerrigter-1 | 0            | 1.9        |
| 6    | xix-expt         | 2            | 0.0        | xix-day-2        | 0            | 1.3        | xix-day-1        | 1            | 2.1        |
| 7    | xix-vaneijck-1   | 0            | 0.4        | xix-facelli-3    | 0            | 2.0        | xix-day-2        | 0            | 3.7        |
| 8    | xix-boerrigter-3 | 0            | 0.7        | xix-boerrigter-1 | 0            | 2.0        | xix-facelli-3    | 0            | 4.2        |
| 9    | xix-day-3        | 0            | 1.3        | xix-boerrigter-3 | 0            | 3.1        | xix-boerrigter-3 | 0            | 5.4        |
| 10   | xix-boerrigter-1 | 0            | 2.1        | xix-day-3        | 0            | 3.4        | xix-day-3        | 0            | 5.5        |
| 11   | xix-price-2      | 0            | 3.2        | xix-price-2      | 0            | 6.2        | xix-price-2      | 0            | 8.8        |
| 12   | xix-scheraga-3   | 0            | 4.9        | xix-scheraga-3   | 0            | 7.3        | xix-scheraga-3   | 0            | 9.9        |
| 13   | xix-desiraju-2   | 1            | 5.4        | xix-desiraju-1   | 1            | 8.1        | xix-desiraju-1   | 1            | 10.2       |
| 14   | xix-facelli-2    | 0            | 6.0        | xix-facelli-2    | 0            | 8.3        | xix-facelli-2    | 0            | 10.5       |
| 15   | xix-boerrigter-2 | 0            | 12.3       | xix-boerrigter-2 | 0            | 12.2       | xix-boerrigter-2 | 0            | 12.0       |
| 16   | xix-price-3      | 0            | 12.5       | xix-price-3      | 0            | 14.8       | xix-price-3      | 0            | 16.9       |
| 17   | xix-scheraga-2   | 1            | 13.8       | xix-facelli-1    | 0            | 16.5       | xix-facelli-1    | 0            | 18.3       |
| 18   | xix-facelli-1    | 0            | 14.8       | xix-scheraga-1   | 1            | 17.3       | xix-scheraga-1   | 1            | 20.9       |
| 19   | xix-valle-2      | 0            | 29.0       | xix-valle-2      | 0            | 34.1       | xix-valle-2      | 0            | 37.4       |
| 20   | xix-desiraju-3   | 0            | 33.5       | xix-desiraju-3   | 0            | 35.9       | xix-desiraju-3   | 0            | 38.2       |
| 21   | xix-valle-3      | 0            | 45.2       | xix-valle-3      | 0            | 52.3       | xix-maleev-3     | 0            | 56.4       |
| 22   | xix-maleev-3     | 0            | 47.8       | xix-maleev-3     | 0            | 52.4       | xix-valle-3      | 0            | 56.7       |
| 23   | xix-valle-1      | 0            | 63.3       | xix-valle-1      | 0            | 64.3       | xix-valle-1      | 0            | 64.6       |

TABLE XXI: Computed energy ranking for unique candidate structures of compound XX, benzyl-(4-(4-methyl-5-(p-tolyl-sulfonyl)-1,3-thiazol-2-yl)phenyl)carbamate. Energies are expressed relative to the experimental form, in kJ/mol.

| Rank | GGA             |              |            | 25X             |              |            | 50X             |              |            |
|------|-----------------|--------------|------------|-----------------|--------------|------------|-----------------|--------------|------------|
|      | Structure       | # Duplicates | $\Delta E$ | Structure       | # Duplicates | $\Delta E$ | Structure       | # Duplicates | $\Delta E$ |
| 1    | xx-price-2      | 0            | -6.7       | xx-price-2      | 0            | -6.5       | xx-price-2      | 0            | -6.7       |
| 2    | xx-kendrick-3   | 2            | -4.8       | xx-kendrick-3   | 2            | -4.8       | xx-kendrick-2   | 0            | -5.5       |
| 3    | xx-kendrick-2   | 0            | -4.4       | xx-kendrick-2   | 0            | -4.7       | xx-vaneijck-2   | 2            | -5.3       |
| 4    | xx-expt         | 2            | 0.0        | xx-expt         | 2            | 0.0        | xx-day-2        | 0            | -1.3       |
| 5    | xx-kendrick-1   | 0            | 2.1        | xx-day-2        | 0            | 0.4        | xx-kendrick-1   | 0            | -0.9       |
| 6    | xx-day-2        | 0            | 2.4        | xx-kendrick-1   | 0            | 0.8        | xx-expt         | 2            | 0.0        |
| 7    | xx-vaneijck-1   | 0            | 3.8        | xx-vaneijck-1   | 0            | 4.7        | xx-vaneijck-1   | 0            | 5.3        |
| 8    | xx-price-3      | 0            | 5.6        | xx-price-3      | 0            | 7.4        | xx-price-3      | 0            | 8.3        |
| 9    | xx-boerrigter-3 | 0            | 12.4       | xx-orendt-1     | 1            | 11.0       | xx-orendt-1     | 1            | 9.1        |
| 10   | xx-orendt-1     | 1            | 12.5       | xx-ammon-2      | 0            | 12.7       | xx-ammon-2      | 0            | 11.3       |
| 11   | xx-maleev-1     | 0            | 12.6       | xx-boerrigter-3 | 0            | 13.0       | xx-boerrigter-3 | 0            | 12.8       |
| 12   | xx-ammon-2      | 0            | 14.6       | xx-maleev-1     | 0            | 13.7       | xx-maleev-1     | 0            | 14.3       |
| 13   | xx-day-3        | 0            | 17.4       | xx-day-3        | 0            | 17.1       | xx-ammon-3      | 0            | 16.0       |
| 14   | xx-orendt-2     | 0            | 18.4       | xx-ammon-3      | 0            | 17.5       | xx-day-3        | 0            | 16.2       |
| 15   | xx-ammon-3      | 0            | 19.5       | xx-orendt-2     | 0            | 18.2       | xx-orendt-2     | 0            | 17.3       |
| 16   | xx-orendt-3     | 0            | 19.8       | xx-orendt-3     | 0            | 19.7       | xx-orendt-3     | 0            | 19.1       |
| 17   | xx-hofmann-2    | 0            | 25.2       | xx-maleev-2     | 0            | 25.7       | xx-maleev-2     | 0            | 25.2       |
| 18   | xx-maleev-2     | 0            | 25.6       | xx-hofmann-2    | 0            | 27.3       | xx-hofmann-2    | 0            | 28.8       |
| 19   | xx-maleev-3     | 0            | 32.3       | xx-venuti-2     | 1            | 31.4       | xx-venuti-2     | 1            | 30.1       |
| 20   | xx-venuti-3     | 1            | 32.5       | xx-hofmann-3    | 0            | 32.6       | xx-hofmann-3    | 0            | 31.3       |
| 21   | xx-hofmann-3    | 0            | 33.0       | xx-venuti-1     | 0            | 33.6       | xx-venuti-1     | 0            | 33.8       |
| 22   | xx-venuti-1     | 0            | 33.4       | xx-maleev-3     | 0            | 35.0       | xx-maleev-3     | 0            | 38.0       |
| 23   | xx-hofmann-1    | 0            | 40.1       | xx-hofmann-1    | 0            | 41.9       | xx-hofmann-1    | 0            | 43.0       |

TABLE XXII: Computed energy ranking for unique candidate structures of compound XXI, gallic acid monohydrate. Energies are expressed relative to the experimental form, in kJ/mol.

| Rank | GGA              |              |            | 25X              |              |            | 50X              |              |            |
|------|------------------|--------------|------------|------------------|--------------|------------|------------------|--------------|------------|
|      | Structure        | # Duplicates | $\Delta E$ | Structure        | # Duplicates | $\Delta E$ | Structure        | # Duplicates | $\Delta E$ |
| 1    | xxi-expt         | 0            | 0.0        | xxi-expt         | 0            | 0.0        | xxi-expt         | 0            | 0.0        |
| 2    | xxi-price-1      | 0            | 0.9        | xxi-price-1      | 0            | 1.9        | xxi-day-2        | 0            | 2.6        |
| 3    | xxi-day-2        | 0            | 1.7        | xxi-day-2        | 0            | 2.2        | xxi-vaneijck-1   | 0            | 2.8        |
| 4    | xxi-vaneijck-1   | 0            | 2.4        | xxi-vaneijck-1   | 0            | 2.6        | xxi-price-1      | 0            | 2.9        |
| 5    | xxi-facelli-3    | 0            | 4.1        | xxi-facelli-1    | 0            | 3.7        | xxi-facelli-1    | 0            | 3.3        |
| 6    | xxi-facelli-1    | 0            | 4.5        | xxi-facelli-3    | 0            | 4.0        | xxi-facelli-3    | 0            | 4.4        |
| 7    | xxi-desiraju-1   | 0            | 4.6        | xxi-facelli-2    | 0            | 7.0        | xxi-facelli-4    | 0            | 7.0        |
| 8    | xxi-facelli-2    | 0            | 6.1        | xxi-desiraju-1   | 0            | 7.2        | xxi-boerrigter-1 | 0            | 7.3        |
| 9    | xxi-facelli-4    | 0            | 8.2        | xxi-facelli-4    | 0            | 7.5        | xxi-facelli-2    | 0            | 7.4        |
| 10   | xxi-boerrigter-1 | 0            | 9.6        | xxi-boerrigter-1 | 0            | 8.3        | xxi-desiraju-1   | 0            | 9.2        |
| 11   | xxi-day-3        | 0            | 14.3       | xxi-day-3        | 0            | 13.5       | xxi-day-3        | 0            | 13.0       |
| 12   | xxi-boerrigter-2 | 0            | 16.5       | xxi-desiraju-2   | 0            | 18.4       | xxi-desiraju-2   | 0            | 19.3       |
| 13   | xxi-desiraju-2   | 0            | 17.1       | xxi-boerrigter-2 | 0            | 19.7       | xxi-boerrigter-2 | 0            | 22.3       |
| 14   | xxi-desiraju-3   | 0            | 26.2       | xxi-desiraju-3   | 0            | 25.5       | xxi-desiraju-3   | 0            | 25.4       |
| 15   | xxi-valle-2      | 0            | 28.4       | xxi-valle-2      | 0            | 28.8       | xxi-valle-2      | 0            | 28.8       |
| 16   | xxi-hofmann-2    | 0            | 35.6       | xxi-hofmann-2    | 0            | 35.4       | xxi-hofmann-2    | 0            | 35.2       |
| 17   | xxi-hofmann-1    | 0            | 36.8       | xxi-hofmann-1    | 0            | 39.3       | xxi-hofmann-1    | 0            | 41.2       |
| 18   | xxi-hofmann-3    | 0            | 49.6       | xxi-hofmann-3    | 0            | 51.0       | xxi-hofmann-3    | 0            | 52.2       |
| 19   | xxi-valle-3      | 0            | 51.3       | xxi-valle-3      | 0            | 51.9       | xxi-valle-3      | 0            | 52.5       |

TABLE XXIII: Computed energy ranking for unique candidate structures of compound XXII, tricyano1,4-dithiino[c]-isothiazole. Energies are expressed relative to the experimental form, in kJ/mol.

| Rank | GGA                        |              |            | 25X                        |              |            | 50X                         |              |            |
|------|----------------------------|--------------|------------|----------------------------|--------------|------------|-----------------------------|--------------|------------|
|      | Structure                  | # Duplicates | $\Delta E$ | Structure                  | # Duplicates | $\Delta E$ | Structure                   | # Duplicates | $\Delta E$ |
| 1    | xxii-szalewicz-price1-1    | 10           | -2.7       | xxii-004                   | 2            | -0.4       | xxii-004                    | 2            | -0.1       |
| 2    | xxii-goto-obata1-1         | 2            | -1.2       | xxii-001                   | 10           | -0.2       | xxii-expt                   | 10           | 0.0        |
| 3    | xxii-elking-fustimolnar1-3 | 16           | -0.9       | xxii-expt                  | 10           | 0.0        | xxii-marom1-2               | 16           | 0.9        |
| 4    | xxii-006                   | 2            | -0.7       | xxii-zhu1-1                | 16           | 0.1        | xxii-001                    | 10           | 1.7        |
| 5    | xxii-marom2-3              | 2            | -0.4       | xxii-006                   | 2            | 1.4        | xxii-poly59-22-4            | 2            | 2.9        |
| 6    | xxii-005                   | 0            | -0.4       | xxii-005                   | 0            | 2.1        | xxii-019                    | 2            | 3.0        |
| 7    | xxii-103                   | 6            | -0.3       | xxii-008                   | 6            | 2.2        | xxii-025                    | 0            | 3.9        |
| 8    | xxii-024                   | 0            | -0.1       | xxii-025                   | 0            | 2.2        | xxii-price2-3               | 0            | 3.9        |
| 9    | xxii-expt                  | 10           | 0.0        | xxii-007                   | 2            | 2.4        | xxii-008                    | 6            | 4.0        |
| 10   | xxii-025                   | 0            | 0.2        | xxii-024                   | 0            | 2.6        | xxii-005                    | 0            | 4.0        |
| 11   | xxii-011                   | 0            | 0.5        | xxii-019                   | 2            | 2.7        | xxii-027                    | 0            | 4.2        |
| 12   | xxii-030                   | 0            | 0.7        | xxii-price2-3              | 0            | 2.7        | xxii-007                    | 2            | 4.4        |
| 13   | xxii-010                   | 0            | 0.8        | xxii-011                   | 0            | 3.1        | xxii-mohamed1-2             | 3            | 4.5        |
| 14   | xxii-lv-wang-ma1-3         | 4            | 1.1        | xxii-030                   | 0            | 3.5        | xxii-024                    | 0            | 4.8        |
| 15   | xxii-price2-3              | 0            | 1.1        | xxii-lv-wang-ma1-2         | 4            | 3.6        | xxii-011                    | 0            | 4.9        |
| 16   | xxii-009                   | 0            | 1.3        | xxii-009                   | 0            | 3.7        | xxii-038                    | 1            | 5.0        |
| 17   | xxii-105                   | 1            | 1.5        | xxii-mohamed1-2            | 3            | 3.8        | xxii-009                    | 0            | 5.4        |
| 18   | xxii-boese-hofmann1-3      | 0            | 1.7        | xxii-063                   | 2            | 3.9        | xxii-brandenburg-grimme1-3  | 0            | 5.5        |
| 19   | xxii-079                   | 0            | 1.7        | xxii-027                   | 0            | 3.9        | xxii-036                    | 0            | 5.6        |
| 20   | xxii-boese-hofmann1-2      | 2            | 1.9        | xxii-035                   | 1            | 4.0        | xxii-063                    | 2            | 5.6        |
| 21   | xxii-071                   | 0            | 1.9        | xxii-087                   | 2            | 4.2        | xxii-088                    | 4            | 5.6        |
| 22   | xxii-012                   | 0            | 2.0        | xxii-brandenburg-grimme1-3 | 0            | 4.3        | xxii-030                    | 0            | 5.6        |
| 23   | xxii-074                   | 0            | 2.0        | xxii-072                   | 0            | 4.4        | xxii-052                    | 1            | 5.8        |
| 24   | xxii-040                   | 0            | 2.1        | xxii-041                   | 0            | 4.5        | xxii-lv-wang-ma2-2          | 3            | 5.8        |
| 25   | xxii-072                   | 0            | 2.2        | xxii-036                   | 0            | 4.5        | xxii-046                    | 0            | 5.9        |
| 26   | xxii-108                   | 2            | 2.3        | xxii-boese-hofmann1-3      | 0            | 4.5        | xxii-041                    | 0            | 5.9        |
| 27   | xxii-pickard-et-al1-1      | 3            | 2.3        | xxii-010                   | 0            | 4.5        | xxii-020                    | 0            | 6.0        |
| 28   | xxii-022                   | 0            | 2.3        | xxii-040                   | 0            | 4.6        | xxii-087                    | 2            | 6.1        |
| 29   | xxii-109                   | 2            | 2.3        | xxii-078                   | 3            | 4.6        | xxii-053                    | 2            | 6.1        |
| 30   | xxii-102                   | 8            | 2.4        | xxii-079                   | 0            | 4.6        | xxii-037                    | 0            | 6.2        |
| 31   | xxii-mohamed1-2            | 3            | 2.7        | xxii-022                   | 0            | 4.7        | xxii-034                    | 0            | 6.2        |
| 32   | xxii-brandenburg-grimme1-3 | 0            | 2.7        | xxii-052                   | 1            | 4.7        | xxii-013                    | 2            | 6.3        |
| 33   | xxii-035                   | 1            | 2.7        | xxii-071                   | 0            | 4.7        | xxii-022                    | 0            | 6.4        |
| 34   | xxii-041                   | 0            | 2.8        | xxii-adjiman-pantelides1-1 | 8            | 4.9        | xxii-072                    | 0            | 6.5        |
| 35   | xxii-zhu2-1                | 2            | 3.1        | xxii-lv-wang-ma2-2         | 3            | 5.0        | xxii-073                    | 0            | 6.5        |
| 36   | xxii-036                   | 0            | 3.2        | xxii-012                   | 0            | 5.0        | xxii-078                    | 3            | 6.6        |
| 37   | xxii-026                   | 0            | 3.2        | xxii-074                   | 0            | 5.0        | xxii-040                    | 0            | 6.6        |
| 38   | xxii-029                   | 0            | 3.3        | xxii-013                   | 2            | 5.0        | xxii-boese-hofmann1-3       | 0            | 6.7        |
| 39   | xxii-vandenende-cuppen2-3  | 1            | 3.3        | xxii-046                   | 0            | 5.0        | xxii-047                    | 0            | 6.7        |
| 40   | xxii-045                   | 0            | 3.4        | xxii-034                   | 0            | 5.1        | xxii-042                    | 0            | 6.8        |
| 41   | xxii-039                   | 1            | 3.5        | xxii-020                   | 0            | 5.1        | xxii-092                    | 0            | 6.8        |
| 42   | xxii-zhu2-3                | 1            | 3.5        | xxii-053                   | 2            | 5.2        | xxii-021                    | 1            | 6.9        |
| 43   | xxii-027                   | 0            | 3.6        | xxii-029                   | 0            | 5.3        | xxii-price1-3               | 8            | 6.9        |
| 44   | xxii-069                   | 0            | 3.6        | xxii-042                   | 0            | 5.3        | xxii-facelli2-3             | 0            | 7.0        |
| 45   | xxii-034                   | 0            | 3.6        | xxii-poly59-22-5           | 1            | 5.3        | xxii-029                    | 0            | 7.0        |
| 46   | xxii-042                   | 0            | 3.6        | xxii-073                   | 0            | 5.3        | xxii-079                    | 0            | 7.1        |
| 47   | xxii-028                   | 0            | 3.7        | xxii-037                   | 0            | 5.4        | xxii-069                    | 0            | 7.1        |
| 48   | xxii-061                   | 0            | 3.7        | xxii-047                   | 0            | 5.4        | xxii-071                    | 0            | 7.2        |
| 49   | xxii-048                   | 0            | 3.7        | xxii-zhu2-3                | 1            | 5.4        | xxii-064                    | 0            | 7.3        |
| 50   | xxii-064                   | 0            | 3.8        | xxii-069                   | 0            | 5.5        | xxii-044                    | 0            | 7.3        |
| 51   | xxii-107                   | 3            | 3.8        | xxii-039                   | 1            | 5.7        | xxii-074                    | 0            | 7.3        |
| 52   | xxii-boese-hofmann1-1      | 0            | 3.8        | xxii-064                   | 0            | 5.7        | xxii-039                    | 1            | 7.4        |
| 53   | xxii-055                   | 0            | 3.8        | xxii-045                   | 0            | 5.8        | xxii-012                    | 0            | 7.4        |
| 54   | xxii-080                   | 0            | 3.9        | xxii-026                   | 0            | 5.8        | xxii-tuckerman-szalewicz1-1 | 1            | 7.5        |
| 55   | xxii-073                   | 0            | 3.9        | xxii-044                   | 0            | 5.9        | xxii-067                    | 0            | 7.5        |
| 56   | xxii-054                   | 0            | 3.9        | xxii-092                   | 0            | 5.9        | xxii-010                    | 0            | 7.5        |
| 57   | xxii-047                   | 0            | 3.9        | xxii-facelli2-3            | 0            | 6.0        | xxii-045                    | 0            | 7.6        |
| 58   | xxii-020                   | 0            | 3.9        | xxii-058                   | 0            | 6.1        | xxii-085                    | 0            | 7.7        |
| 59   | xxii-068                   | 0            | 3.9        | xxii-061                   | 0            | 6.2        | xxii-026                    | 0            | 7.8        |
| 60   | xxii-044                   | 0            | 3.9        | xxii-086                   | 0            | 6.3        | xxii-061                    | 0            | 7.9        |
| 61   | xxii-046                   | 0            | 4.0        | xxii-boese-hofmann1-1      | 0            | 6.4        | xxii-058                    | 0            | 8.0        |
| 62   | xxii-015                   | 0            | 4.0        | xxii-043                   | 0            | 6.4        | xxii-086                    | 0            | 8.2        |

Continued

| Rank | GGA                        |              |            | 25X                         |              |            | 50X                        |              |            |
|------|----------------------------|--------------|------------|-----------------------------|--------------|------------|----------------------------|--------------|------------|
|      | Structure                  | # Duplicates | $\Delta E$ | Structure                   | # Duplicates | $\Delta E$ | Structure                  | # Duplicates | $\Delta E$ |
| 63   | xxii-016                   | 0            | 4.0        | xxii-067                    | 0            | 6.5        | xxii-083                   | 0            | 8.3        |
| 64   | xxii-110                   | 2            | 4.0        | xxii-085                    | 0            | 6.5        | xxii-043                   | 0            | 8.3        |
| 65   | xxii-031                   | 0            | 4.0        | xxii-016                    | 0            | 6.6        | xxii-070                   | 0            | 8.4        |
| 66   | xxii-058                   | 0            | 4.1        | xxii-031                    | 0            | 6.7        | xxii-poly59-22-5           | 1            | 8.5        |
| 67   | xxii-086                   | 0            | 4.2        | xxii-070                    | 0            | 6.7        | xxii-016                   | 0            | 8.5        |
| 68   | xxii-043                   | 0            | 4.2        | xxii-083                    | 0            | 6.8        | xxii-031                   | 0            | 8.5        |
| 69   | xxii-018                   | 0            | 4.3        | xxii-tuckerman-szalewicz1-1 | 1            | 6.8        | xxii-boese-hofmann1-1      | 0            | 8.6        |
| 70   | xxii-goto-obata2-2         | 0            | 4.3        | xxii-048                    | 0            | 6.9        | xxii-059                   | 0            | 8.7        |
| 71   | xxii-051                   | 0            | 4.4        | xxii-goto-obata2-2          | 0            | 6.9        | xxii-goto-obata2-3         | 0            | 8.7        |
| 72   | xxii-097                   | 0            | 4.5        | xxii-055                    | 0            | 6.9        | xxii-goto-obata2-2         | 0            | 8.9        |
| 73   | xxii-037                   | 0            | 4.5        | xxii-018                    | 0            | 6.9        | xxii-050                   | 0            | 9.0        |
| 74   | xxii-050                   | 0            | 4.5        | xxii-050                    | 0            | 6.9        | xxii-018                   | 0            | 9.0        |
| 75   | xxii-092                   | 0            | 4.7        | xxii-059                    | 0            | 7.0        | xxii-dzyabchenko-3         | 0            | 9.0        |
| 76   | xxii-075                   | 0            | 4.7        | xxii-015                    | 0            | 7.2        | xxii-048                   | 0            | 9.1        |
| 77   | xxii-brandenburg-grimme1-2 | 0            | 4.7        | xxii-097                    | 0            | 7.2        | xxii-097                   | 0            | 9.3        |
| 78   | xxii-cole-1                | 1            | 4.7        | xxii-054                    | 0            | 7.2        | xxii-055                   | 0            | 9.4        |
| 79   | xxii-023                   | 1            | 4.8        | xxii-080                    | 0            | 7.3        | xxii-062                   | 0            | 9.4        |
| 80   | xxii-090                   | 0            | 4.8        | xxii-100                    | 0            | 7.4        | xxii-100                   | 0            | 9.5        |
| 81   | xxii-077                   | 0            | 4.8        | xxii-brandenburg-grimme1-2  | 0            | 7.4        | xxii-brandenburg-grimme1-2 | 0            | 9.6        |
| 82   | xxii-070                   | 0            | 4.9        | xxii-068                    | 0            | 7.6        | xxii-015                   | 0            | 9.7        |
| 83   | xxii-100                   | 0            | 4.9        | xxii-077                    | 0            | 7.7        | xxii-077                   | 0            | 10.0       |
| 84   | xxii-083                   | 0            | 4.9        | xxii-028                    | 0            | 7.7        | xxii-076                   | 0            | 10.0       |
| 85   | xxii-065                   | 0            | 4.9        | xxii-goto-obata2-3          | 0            | 7.7        | xxii-084                   | 0            | 10.0       |
| 86   | xxii-076                   | 0            | 5.0        | xxii-062                    | 0            | 7.7        | xxii-054                   | 0            | 10.1       |
| 87   | xxii-067                   | 0            | 5.1        | xxii-076                    | 0            | 7.9        | xxii-080                   | 0            | 10.1       |
| 88   | xxii-059                   | 0            | 5.1        | xxii-051                    | 0            | 7.9        | xxii-065                   | 0            | 10.3       |
| 89   | xxii-094                   | 0            | 5.1        | xxii-cole-1                 | 1            | 7.9        | xxii-090                   | 0            | 10.5       |
| 90   | xxii-facelli2-3            | 0            | 5.2        | xxii-065                    | 0            | 7.9        | xxii-093                   | 0            | 10.5       |
| 91   | xxii-095                   | 0            | 5.2        | xxii-090                    | 0            | 7.9        | xxii-adjiman-pantelides1-3 | 0            | 10.5       |
| 92   | xxii-089                   | 0            | 5.3        | xxii-023                    | 1            | 8.0        | xxii-049                   | 1            | 10.6       |
| 93   | xxii-085                   | 0            | 5.3        | xxii-075                    | 0            | 8.1        | xxii-091                   | 1            | 10.6       |
| 94   | xxii-082                   | 0            | 5.4        | xxii-084                    | 0            | 8.4        | xxii-051                   | 0            | 10.8       |
| 95   | xxii-062                   | 0            | 5.4        | xxii-095                    | 0            | 8.4        | xxii-068                   | 0            | 10.8       |
| 96   | xxii-066                   | 0            | 5.5        | xxii-082                    | 0            | 8.4        | xxii-082                   | 0            | 10.9       |
| 97   | xxii-podeszwa1-3           | 1            | 5.8        | xxii-dzyabchenko-3          | 0            | 8.5        | xxii-028                   | 0            | 10.9       |
| 98   | xxii-081                   | 0            | 5.8        | xxii-066                    | 0            | 8.6        | xxii-lv-wang-ma2-3         | 1            | 10.9       |
| 99   | xxii-060                   | 1            | 5.8        | xxii-093                    | 0            | 8.7        | xxii-066                   | 0            | 11.0       |
| 100  | xxii-098                   | 0            | 6.0        | xxii-094                    | 0            | 8.9        | xxii-facelli2-1            | 0            | 11.0       |
| 101  | xxii-084                   | 0            | 6.3        | xxii-089                    | 0            | 9.1        | xxii-075                   | 0            | 11.1       |
| 102  | xxii-093                   | 0            | 6.4        | xxii-081                    | 0            | 9.1        | xxii-095                   | 0            | 11.1       |
| 103  | xxii-goto-obata2-3         | 0            | 6.4        | xxii-szalewicz-price1-2     | 0            | 9.2        | xxii-szalewicz-price1-2    | 0            | 11.2       |
| 104  | xxii-szalewicz-price1-2    | 0            | 6.8        | xxii-060                    | 1            | 9.2        | xxii-094                   | 0            | 11.7       |
| 105  | xxii-dzyabchenko-3         | 0            | 7.3        | xxii-adjiman-pantelides1-3  | 0            | 9.3        | xxii-081                   | 0            | 11.8       |
| 106  | xxii-096                   | 0            | 7.5        | xxii-facelli2-1             | 0            | 9.4        | xxii-060                   | 1            | 12.0       |
| 107  | xxii-facelli2-1            | 0            | 7.6        | xxii-lv-wang-ma2-3          | 1            | 9.4        | xxii-089                   | 0            | 12.3       |
| 108  | xxii-lv-wang-ma2-3         | 1            | 7.9        | xxii-098                    | 0            | 10.3       | xxii-vandenende-cuppen2-1  | 0            | 12.6       |
| 109  | xxii-099                   | 0            | 7.9        | xxii-facelli1-3             | 0            | 11.0       | xxii-goto-obata2-1         | 0            | 13.5       |
| 110  | xxii-facelli1-3            | 0            | 7.9        | xxii-099                    | 0            | 11.1       | xxii-facelli1-3            | 0            | 13.7       |
| 111  | xxii-adjiman-pantelides1-3 | 0            | 8.0        | xxii-vandenende-cuppen2-1   | 0            | 11.7       | xxii-099                   | 0            | 13.9       |
| 112  | xxii-goto-obata2-1         | 0            | 9.0        | xxii-goto-obata2-1          | 0            | 11.7       | xxii-098                   | 0            | 13.9       |
| 113  | xxii-lv-wang-ma2-1         | 0            | 9.1        | xxii-096                    | 0            | 12.2       | xxii-podeszwa1-1           | 3            | 15.3       |
| 114  | xxii-hofmann1-3            | 0            | 9.9        | xxii-lv-wang-ma2-1          | 0            | 13.1       | xxii-096                   | 0            | 15.9       |
| 115  | xxii-vandenende-cuppen2-1  | 0            | 10.8       | xxii-hofmann1-3             | 0            | 14.0       | xxii-lv-wang-ma2-1         | 0            | 16.1       |
| 116  | xxii-vaneijck1-1           | 3            | 12.9       | xxii-podeszwa1-1            | 3            | 14.1       | xxii-brandenburg-grimme1-1 | 0            | 16.7       |
| 117  | xxii-cole-3                | 0            | 15.2       | xxii-brandenburg-grimme1-1  | 0            | 16.0       | xxii-hofmann1-3            | 0            | 17.3       |
| 118  | xxii-brandenburg-grimme1-1 | 0            | 15.2       | xxii-chadha-singh-2         | 0            | 16.9       | xxii-chadha-singh-2        | 0            | 18.0       |
| 119  | xxii-chadha-singh-2        | 0            | 15.3       | xxii-vaneijck1-3            | 0            | 16.9       | xxii-vaneijck1-3           | 0            | 18.3       |
| 120  | xxii-vaneijck1-3           | 0            | 15.4       | xxii-cole-3                 | 0            | 17.5       | xxii-cole-3                | 0            | 19.4       |
| 121  | xxii-cole-2                | 0            | 18.1       | xxii-cole-2                 | 0            | 19.7       | xxii-cole-2                | 0            | 21.2       |
| 122  | xxii-chadha-singh-3        | 0            | 20.7       | xxii-chadha-singh-3         | 0            | 22.4       | xxii-chadha-singh-3        | 0            | 23.9       |
| 123  | xxii-chadha-singh-1        | 0            | 21.2       | xxii-chadha-singh-1         | 0            | 23.9       | xxii-chadha-singh-1        | 0            | 26.4       |
| 124  | xxii-hofmann1-2            | 0            | 27.2       | xxii-hofmann1-2             | 0            | 33.7       | xxii-hofmann1-2            | 0            | 38.8       |

TABLE XXIV: Computed energy ranking for unique candidate structures of compound XXIII, 2-((4-(3,4-dichlorophenethyl)phenyl)amino)benzoic acid. Energies are expressed relative to the experimental form c, in kJ/mol.

| Rank | GGA                          |              |            | 25X                    |              |            | 50X                    |              |            |
|------|------------------------------|--------------|------------|------------------------|--------------|------------|------------------------|--------------|------------|
|      | Structure                    | # Duplicates | $\Delta E$ | Structure              | # Duplicates | $\Delta E$ | Structure              | # Duplicates | $\Delta E$ |
| 1    | xxiii-neumann2-2             | 1            | -0.8       | xxiii-005              | 0            | 0.0        | xxiii-005              | 0            | 0.0        |
| 2    | xxiii-005                    | 0            | -0.0       | xxiii-expt-c           | 2            | 0.0        | xxiii-expt-c           | 2            | 0.0        |
| 3    | xxiii-expt-c                 | 2            | 0.0        | xxiii-expt-b           | 8            | 0.8        | xxiii-expt-b           | 8            | 1.3        |
| 4    | xxiii-expt-b                 | 8            | 0.3        | xxiii-018              | 1            | 1.5        | xxiii-018              | 1            | 1.8        |
| 5    | xxiii-070                    | 0            | 0.6        | xxiii-011              | 6            | 1.6        | xxiii-011              | 6            | 2.3        |
| 6    | xxiii-neumann1-3             | 6            | 0.7        | xxiii-070              | 0            | 1.8        | xxiii-070              | 0            | 3.0        |
| 7    | xxiii-neumann2-1             | 1            | 0.7        | xxiii-neumann2-2       | 1            | 1.9        | xxiii-expt-e           | 1            | 3.0        |
| 8    | xxiii-003                    | 1            | 0.8        | xxiii-expt-e           | 1            | 2.1        | xxiii-026              | 0            | 3.3        |
| 9    | xxiii-015                    | 1            | 0.9        | xxiii-expt-a           | 2            | 2.2        | xxiii-expt-a           | 2            | 3.4        |
| 10   | xxiii-expt-a                 | 2            | 1.0        | xxiii-026              | 0            | 2.5        | xxiii-025              | 0            | 3.9        |
| 11   | xxiii-expt-e                 | 1            | 1.0        | xxiii-neumann2-1       | 1            | 2.7        | xxiii-poly59-23-2      | 3            | 4.0        |
| 12   | xxiii-expt-d                 | 3            | 1.0        | xxiii-expt-d           | 3            | 3.0        | xxiii-030              | 0            | 4.2        |
| 13   | xxiii-024                    | 0            | 1.4        | xxiii-022              | 0            | 3.2        | xxiii-neumann2-1       | 1            | 4.2        |
| 14   | xxiii-022                    | 0            | 1.6        | xxiii-025              | 0            | 3.2        | xxiii-neumann2-2       | 1            | 4.5        |
| 15   | xxiii-007                    | 0            | 1.7        | xxiii-007              | 0            | 3.3        | xxiii-expt-d           | 3            | 4.7        |
| 16   | xxiii-008                    | 0            | 1.7        | xxiii-042              | 7            | 3.4        | xxiii-042              | 7            | 4.7        |
| 17   | xxiii-026                    | 0            | 1.8        | xxiii-030              | 0            | 3.5        | xxiii-007              | 0            | 4.8        |
| 18   | xxiii-020                    | 0            | 1.8        | xxiii-poly59-23-2      | 3            | 3.7        | xxiii-022              | 0            | 5.0        |
| 19   | xxiii-023                    | 0            | 1.9        | xxiii-neumann1-1       | 1            | 3.8        | xxiii-100              | 0            | 5.0        |
| 20   | xxiii-010                    | 0            | 2.0        | xxiii-tkatchenko2-1    | 4            | 4.1        | xxiii-080              | 1            | 5.1        |
| 21   | xxiii-038                    | 0            | 2.1        | xxiii-013              | 1            | 4.2        | xxiii-063              | 0            | 5.1        |
| 22   | xxiii-013                    | 1            | 2.2        | xxiii-021              | 0            | 4.2        | xxiii-067              | 0            | 5.3        |
| 23   | xxiii-vaneijck1-1            | 2            | 2.3        | xxiii-068              | 3            | 4.2        | xxiii-057              | 0            | 5.5        |
| 24   | xxiii-042                    | 7            | 2.3        | xxiii-080              | 1            | 4.2        | xxiii-tkatchenko2-1    | 4            | 5.5        |
| 25   | xxiii-025                    | 0            | 2.4        | xxiii-033              | 0            | 4.2        | xxiii-021              | 0            | 5.5        |
| 26   | xxiii-021                    | 0            | 2.4        | xxiii-008              | 0            | 4.3        | xxiii-033              | 0            | 5.5        |
| 27   | xxiii-053                    | 0            | 2.5        | xxiii-100              | 0            | 4.3        | xxiii-013              | 1            | 5.6        |
| 28   | xxiii-030                    | 0            | 2.6        | xxiii-053              | 0            | 4.3        | xxiii-097              | 0            | 5.6        |
| 29   | xxiii-mohamed1-2             | 4            | 2.7        | xxiii-024              | 0            | 4.3        | xxiii-tkatchenko1-3    | 3            | 5.6        |
| 30   | xxiii-062                    | 0            | 2.7        | xxiii-063              | 0            | 4.4        | xxiii-047              | 0            | 5.6        |
| 31   | xxiii-056                    | 1            | 2.8        | xxiii-010              | 0            | 4.4        | xxiii-059              | 0            | 5.7        |
| 32   | xxiii-brandenburg-grimmel1-2 | 3            | 2.8        | xxiii-067              | 0            | 4.4        | xxiii-052              | 0            | 5.7        |
| 33   | xxiii-048                    | 0            | 3.0        | xxiii-poly59-23-1      | 3            | 4.4        | xxiii-060              | 0            | 5.7        |
| 34   | xxiii-036                    | 0            | 3.0        | xxiii-boese-hofmann1-1 | 1            | 4.5        | xxiii-poly59-23-1      | 3            | 5.7        |
| 35   | xxiii-027                    | 0            | 3.0        | xxiii-036              | 0            | 4.5        | xxiii-036              | 0            | 5.9        |
| 36   | xxiii-adjiman-pantelides1-2  | 3            | 3.0        | xxiii-057              | 0            | 4.7        | xxiii-095              | 0            | 6.0        |
| 37   | xxiii-033                    | 0            | 3.0        | xxiii-097              | 0            | 4.7        | xxiii-035              | 0            | 6.1        |
| 38   | xxiii-080                    | 1            | 3.2        | xxiii-059              | 0            | 4.7        | xxiii-065              | 0            | 6.1        |
| 39   | xxiii-034                    | 0            | 3.3        | xxiii-vaneijck1-1      | 2            | 4.7        | xxiii-053              | 0            | 6.1        |
| 40   | xxiii-102                    | 3            | 3.3        | xxiii-047              | 0            | 4.7        | xxiii-010              | 0            | 6.4        |
| 41   | xxiii-046                    | 0            | 3.3        | xxiii-060              | 0            | 4.7        | xxiii-boese-hofmann1-1 | 1            | 6.5        |
| 42   | xxiii-044                    | 0            | 3.3        | xxiii-052              | 0            | 4.7        | xxiii-008              | 0            | 6.5        |
| 43   | xxiii-041                    | 0            | 3.4        | xxiii-035              | 0            | 4.8        | xxiii-043              | 0            | 6.7        |
| 44   | xxiii-029                    | 0            | 3.4        | xxiii-020              | 0            | 4.9        | xxiii-083              | 0            | 6.7        |
| 45   | xxiii-043                    | 0            | 3.4        | xxiii-095              | 0            | 4.9        | xxiii-neumann1-1       | 1            | 7.0        |
| 46   | xxiii-067                    | 0            | 3.5        | xxiii-065              | 0            | 4.9        | xxiii-024              | 0            | 7.2        |
| 47   | xxiii-076                    | 0            | 3.5        | xxiii-023              | 0            | 4.9        | xxiii-091              | 0            | 7.2        |
| 48   | xxiii-100                    | 0            | 3.5        | xxiii-043              | 0            | 5.1        | xxiii-049              | 3            | 7.2        |
| 49   | xxiii-063                    | 0            | 3.6        | xxiii-083              | 0            | 5.3        | xxiii-054              | 0            | 7.2        |
| 50   | xxiii-097                    | 0            | 3.7        | xxiii-038              | 0            | 5.3        | xxiii-vaneijck1-1      | 2            | 7.5        |
| 51   | xxiii-071                    | 0            | 3.7        | xxiii-046              | 0            | 5.4        | xxiii-029              | 0            | 7.5        |
| 52   | xxiii-095                    | 0            | 3.8        | xxiii-091              | 0            | 5.6        | xxiii-046              | 0            | 7.6        |
| 53   | xxiii-065                    | 0            | 3.8        | xxiii-054              | 0            | 5.6        | xxiii-040              | 0            | 7.7        |
| 54   | xxiii-goto-obata1-3          | 1            | 3.8        | xxiii-049              | 3            | 5.6        | xxiii-073              | 0            | 7.7        |
| 55   | xxiii-045                    | 1            | 3.8        | xxiii-029              | 0            | 5.6        | xxiii-038              | 0            | 7.9        |
| 56   | xxiii-060                    | 0            | 3.8        | xxiii-048              | 0            | 5.8        | xxiii-032              | 0            | 7.9        |
| 57   | xxiii-059                    | 0            | 3.8        | xxiii-040              | 0            | 5.9        | xxiii-087              | 0            | 7.9        |
| 58   | xxiii-047                    | 0            | 3.8        | xxiii-044              | 0            | 5.9        | xxiii-090              | 0            | 8.1        |
| 59   | xxiii-052                    | 0            | 3.9        | xxiii-073              | 0            | 6.0        | xxiii-044              | 0            | 8.1        |
| 60   | xxiii-057                    | 0            | 3.9        | xxiii-090              | 0            | 6.1        | xxiii-020              | 0            | 8.2        |
| 61   | xxiii-035                    | 0            | 3.9        | xxiii-041              | 0            | 6.1        | xxiii-023              | 0            | 8.3        |
| 62   | xxiii-064                    | 0            | 3.9        | xxiii-032              | 0            | 6.1        | xxiii-goto-obata2-1    | 2            | 8.3        |
| 63   | xxiii-055                    | 0            | 3.9        | xxiii-062              | 0            | 6.1        | xxiii-boese-hofmann1-2 | 0            | 8.5        |
| 64   | xxiii-boese-hofmann1-3       | 3            | 3.9        | xxiii-027              | 0            | 6.2        | xxiii-048              | 0            | 8.6        |
| 65   | xxiii-091                    | 0            | 4.0        | xxiii-goto-obata2-1    | 2            | 6.2        | xxiii-041              | 0            | 8.9        |

Continued



| Rank | GGA                         |              |            | 25X                         |              |            | 50X                         |              |            |
|------|-----------------------------|--------------|------------|-----------------------------|--------------|------------|-----------------------------|--------------|------------|
|      | Structure                   | # Duplicates | $\Delta E$ | Structure                   | # Duplicates | $\Delta E$ | Structure                   | # Duplicates | $\Delta E$ |
| 66   | xxiii-adjiman-pantelides1-1 | 2            | 4.0        | xxiii-071                   | 0            | 6.2        | xxiii-071                   | 0            | 8.9        |
| 67   | xxiii-040                   | 0            | 4.0        | xxiii-076                   | 0            | 6.3        | xxiii-051                   | 0            | 9.1        |
| 68   | xxiii-054                   | 0            | 4.2        | xxiii-034                   | 0            | 6.4        | xxiii-089                   | 0            | 9.1        |
| 69   | xxiii-032                   | 0            | 4.2        | xxiii-boese-hofmann1-2      | 0            | 6.5        | xxiii-poly59-23-6           | 1            | 9.2        |
| 70   | xxiii-058                   | 0            | 4.2        | xxiii-087                   | 0            | 6.5        | xxiii-058                   | 0            | 9.2        |
| 71   | xxiii-083                   | 0            | 4.2        | xxiii-064                   | 0            | 6.6        | xxiii-062                   | 0            | 9.3        |
| 72   | xxiii-090                   | 0            | 4.2        | xxiii-045                   | 1            | 6.8        | xxiii-079                   | 0            | 9.4        |
| 73   | xxiii-109                   | 1            | 4.4        | xxiii-058                   | 0            | 6.8        | xxiii-076                   | 0            | 9.4        |
| 74   | xxiii-073                   | 0            | 4.4        | xxiii-082                   | 1            | 7.0        | xxiii-096                   | 0            | 9.5        |
| 75   | xxiii-072                   | 0            | 4.5        | xxiii-089                   | 0            | 7.1        | xxiii-086                   | 1            | 9.6        |
| 76   | xxiii-boese-hofmann1-2      | 0            | 4.5        | xxiii-069                   | 1            | 7.1        | xxiii-027                   | 0            | 9.6        |
| 77   | xxiii-092                   | 1            | 4.5        | xxiii-poly59-23-9           | 1            | 7.2        | xxiii-064                   | 0            | 9.7        |
| 78   | xxiii-075                   | 0            | 4.6        | xxiii-051                   | 0            | 7.3        | xxiii-034                   | 0            | 9.7        |
| 79   | xxiii-082                   | 1            | 4.6        | xxiii-072                   | 0            | 7.3        | xxiii-069                   | 1            | 9.8        |
| 80   | xxiii-069                   | 1            | 4.6        | xxiii-096                   | 0            | 7.3        | xxiii-poly59-23-9           | 1            | 9.9        |
| 81   | xxiii-061                   | 0            | 4.7        | xxiii-055                   | 0            | 7.3        | xxiii-045                   | 1            | 9.9        |
| 82   | xxiii-077                   | 0            | 4.8        | xxiii-075                   | 0            | 7.3        | xxiii-075                   | 0            | 10.0       |
| 83   | xxiii-088                   | 0            | 5.0        | xxiii-077                   | 0            | 7.4        | xxiii-072                   | 0            | 10.0       |
| 84   | xxiii-084                   | 0            | 5.0        | xxiii-079                   | 0            | 7.5        | xxiii-077                   | 0            | 10.2       |
| 85   | xxiii-day1-1                | 1            | 5.1        | xxiii-037                   | 1            | 7.5        | xxiii-078                   | 1            | 10.2       |
| 86   | xxiii-089                   | 0            | 5.1        | xxiii-093                   | 0            | 7.6        | xxiii-093                   | 0            | 10.3       |
| 87   | xxiii-079                   | 0            | 5.2        | xxiii-088                   | 0            | 7.8        | xxiii-poly59-23-8           | 1            | 10.8       |
| 88   | xxiii-093                   | 0            | 5.2        | xxiii-poly59-23-6           | 1            | 7.8        | xxiii-055                   | 0            | 10.8       |
| 89   | xxiii-096                   | 0            | 5.2        | xxiii-day2-1                | 1            | 7.9        | xxiii-day2-1                | 1            | 10.9       |
| 90   | xxiii-051                   | 0            | 5.3        | xxiii-078                   | 1            | 8.2        | xxiii-088                   | 0            | 11.0       |
| 91   | xxiii-087                   | 0            | 5.3        | xxiii-061                   | 0            | 8.4        | xxiii-zhu1-1                | 0            | 11.1       |
| 92   | xxiii-081                   | 0            | 5.8        | xxiii-zhu1-1                | 0            | 8.5        | xxiii-037                   | 1            | 11.5       |
| 93   | xxiii-goto-obata1-1         | 0            | 5.9        | xxiii-092                   | 1            | 8.8        | xxiii-094                   | 0            | 11.8       |
| 94   | xxiii-078                   | 1            | 6.2        | xxiii-084                   | 0            | 8.9        | xxiii-061                   | 0            | 12.0       |
| 95   | xxiii-zhu1-1                | 0            | 6.2        | xxiii-poly59-23-8           | 1            | 9.0        | xxiii-zhu1-2                | 0            | 12.2       |
| 96   | xxiii-094                   | 0            | 6.3        | xxiii-094                   | 0            | 9.1        | xxiii-110                   | 1            | 12.5       |
| 97   | xxiii-day2-2                | 0            | 6.9        | xxiii-081                   | 0            | 9.3        | xxiii-elking-fustimolnar1-1 | 0            | 12.5       |
| 98   | xxiii-poly59-23-6           | 1            | 6.9        | xxiii-zhu1-2                | 0            | 9.5        | xxiii-081                   | 0            | 12.8       |
| 99   | xxiii-zhu1-2                | 0            | 7.2        | xxiii-goto-obata1-1         | 0            | 10.1       | xxiii-084                   | 0            | 13.0       |
| 100  | xxiii-108                   | 1            | 7.4        | xxiii-day2-2                | 0            | 10.2       | xxiii-day2-2                | 0            | 13.2       |
| 101  | xxiii-zhu1-3                | 0            | 8.0        | xxiii-zhu1-3                | 0            | 10.3       | xxiii-zhu1-3                | 0            | 13.2       |
| 102  | xxiii-vanejck1-2            | 1            | 8.4        | xxiii-110                   | 1            | 10.6       | xxiii-066                   | 1            | 13.3       |
| 103  | xxiii-elking-fustimolnar2-1 | 0            | 8.6        | xxiii-vanejck1-2            | 1            | 10.7       | xxiii-elking-fustimolnar2-1 | 0            | 13.6       |
| 104  | xxiii-vanejck1-3            | 0            | 8.8        | xxiii-elking-fustimolnar1-1 | 0            | 10.8       | xxiii-vanejck1-2            | 1            | 13.6       |
| 105  | xxiii-110                   | 1            | 8.9        | xxiii-elking-fustimolnar2-1 | 0            | 11.0       | xxiii-vanejck1-3            | 0            | 13.8       |
| 106  | xxiii-elking-fustimolnar1-1 | 0            | 9.0        | xxiii-vanejck1-3            | 0            | 11.0       | xxiii-day2-3                | 1            | 14.5       |
| 107  | xxiii-day1-2                | 1            | 9.9        | xxiii-day2-3                | 1            | 12.3       | xxiii-goto-obata1-1         | 0            | 14.6       |
| 108  | xxiii-elking-fustimolnar1-3 | 0            | 10.9       | xxiii-elking-fustimolnar1-3 | 0            | 14.5       | xxiii-day1-3                | 0            | 17.9       |
| 109  | xxiii-brandenburg-grimme1-1 | 0            | 12.2       | xxiii-brandenburg-grimme1-1 | 0            | 15.0       | xxiii-elking-fustimolnar1-3 | 0            | 18.3       |
| 110  | xxiii-day1-3                | 0            | 12.7       | xxiii-day1-3                | 0            | 15.3       | xxiii-brandenburg-grimme1-1 | 0            | 18.3       |
| 111  | xxiii-vandenende-cuppen2-1  | 0            | 13.1       | xxiii-vandenende-cuppen2-1  | 0            | 16.6       | xxiii-goto-obata2-2         | 0            | 19.2       |
| 112  | xxiii-elking-fustimolnar1-2 | 0            | 14.7       | xxiii-goto-obata2-2         | 0            | 17.3       | xxiii-vandenende-cuppen2-1  | 0            | 20.5       |
| 113  | xxiii-goto-obata2-2         | 0            | 15.4       | xxiii-elking-fustimolnar1-2 | 0            | 19.7       | xxiii-elking-fustimolnar2-3 | 0            | 23.9       |
| 114  | xxiii-elking-fustimolnar2-3 | 0            | 15.5       | xxiii-elking-fustimolnar2-3 | 0            | 19.7       | xxiii-goto-obata2-3         | 0            | 24.1       |
| 115  | xxiii-goto-obata2-3         | 0            | 16.0       | xxiii-goto-obata2-3         | 0            | 20.3       | xxiii-elking-fustimolnar1-2 | 0            | 24.8       |
| 116  | xxiii-vandenende-cuppen1-2  | 0            | 18.4       | xxiii-vandenende-cuppen1-2  | 0            | 21.6       | xxiii-vandenende-cuppen1-2  | 0            | 25.0       |
| 117  | xxiii-elking-fustimolnar2-2 | 0            | 18.5       | xxiii-elking-fustimolnar2-2 | 0            | 22.3       | xxiii-elking-fustimolnar2-2 | 0            | 25.8       |
| 118  | xxiii-facelli1-1            | 0            | 21.8       | xxiii-facelli1-1            | 0            | 25.1       | xxiii-vandenende-cuppen2-2  | 0            | 25.8       |
| 119  | xxiii-facelli1-3            | 0            | 22.2       | xxiii-vandenende-cuppen2-2  | 0            | 25.4       | xxiii-facelli1-1            | 0            | 28.0       |
| 120  | xxiii-hofmann1-1            | 0            | 22.6       | xxiii-facelli1-3            | 0            | 26.0       | xxiii-facelli1-3            | 0            | 29.6       |
| 121  | xxiii-facelli1-2            | 0            | 24.0       | xxiii-hofmann1-1            | 0            | 26.2       | xxiii-hofmann1-1            | 0            | 29.8       |
| 122  | xxiii-vandenende-cuppen2-2  | 0            | 25.8       | xxiii-facelli1-2            | 0            | 27.5       | xxiii-facelli1-2            | 0            | 30.6       |
| 123  | xxiii-vandenende-cuppen2-3  | 0            | 31.2       | xxiii-vandenende-cuppen2-3  | 0            | 31.7       | xxiii-vandenende-cuppen2-3  | 0            | 33.3       |
| 124  | xxiii-hofmann1-3            | 0            | 33.8       | xxiii-vandenende-cuppen1-3  | 0            | 34.9       | xxiii-vandenende-cuppen1-3  | 0            | 36.5       |
| 125  | xxiii-vandenende-cuppen1-3  | 0            | 33.9       | xxiii-chadha-singh-1        | 1            | 36.5       | xxiii-chadha-singh-1        | 1            | 37.5       |
| 126  | xxiii-chadha-singh-1        | 1            | 35.3       | xxiii-hofmann1-3            | 0            | 36.6       | xxiii-hofmann1-3            | 0            | 39.8       |
| 127  | xxiii-cole-1                | 0            | 39.1       | xxiii-cole-1                | 0            | 41.5       | xxiii-cole-1                | 0            | 44.3       |
| 128  | xxiii-cole-2                | 0            | 45.6       | xxiii-cole-2                | 0            | 47.9       | xxiii-cole-2                | 0            | 50.4       |
| 129  | xxiii-vandenende-cuppen1-1  | 0            | 45.8       | xxiii-vandenende-cuppen1-1  | 0            | 48.1       | xxiii-chadha-singh-3        | 0            | 50.8       |
| 130  | xxiii-chadha-singh-3        | 0            | 46.4       | xxiii-chadha-singh-3        | 0            | 48.2       | xxiii-vandenende-cuppen1-1  | 0            | 51.2       |
| 131  | xxiii-hofmann1-2            | 0            | 57.6       | xxiii-hofmann1-2            | 0            | 60.9       | xxiii-hofmann1-2            | 0            | 64.3       |

TABLE XXV: Computed energy ranking for unique candidate structures of compound XXIV, chloride salt hydrate of (Z)-3-((diaminomethyl)thio)acrylic acid. Energies are expressed relative to the experimental form, in kJ/mol.

| Rank | GGA                   |              |            | 25X                   |              |            | 50X                   |              |            |
|------|-----------------------|--------------|------------|-----------------------|--------------|------------|-----------------------|--------------|------------|
|      | Structure             | # Duplicates | $\Delta E$ | Structure             | # Duplicates | $\Delta E$ | Structure             | # Duplicates | $\Delta E$ |
| 1    | xxiv-zhu1-3           | 2            | -2.0       | xxiv-boese-hofmann1-1 | 1            | -0.7       | xxiv-boese-hofmann1-1 | 1            | -0.4       |
| 2    | xxiv-003              | 1            | -1.3       | xxiv-003              | 1            | 0.0        | xxiv-expt             | 3            | 0.0        |
| 3    | xxiv-boese-hofmann1-1 | 1            | -1.1       | xxiv-expt             | 3            | 0.0        | xxiv-003              | 1            | 1.0        |
| 4    | xxiv-010              | 0            | -0.8       | xxiv-010              | 0            | 0.6        | xxiv-010              | 0            | 1.5        |
| 5    | xxiv-016              | 0            | -0.4       | xxiv-012              | 1            | 1.6        | xxiv-027              | 0            | 3.0        |
| 6    | xxiv-012              | 1            | -0.2       | xxiv-001              | 2            | 1.7        | xxiv-012              | 1            | 3.1        |
| 7    | xxiv-005              | 0            | -0.0       | xxiv-018              | 1            | 2.3        | xxiv-008              | 0            | 3.3        |
| 8    | xxiv-expt             | 3            | 0.0        | xxiv-016              | 0            | 2.3        | xxiv-009              | 0            | 3.8        |
| 9    | xxiv-015              | 1            | 0.0        | xxiv-008              | 0            | 2.8        | xxiv-019              | 0            | 3.9        |
| 10   | xxiv-011              | 0            | 0.7        | xxiv-027              | 0            | 3.1        | xxiv-018              | 1            | 4.1        |
| 11   | xxiv-022              | 0            | 1.1        | xxiv-022              | 0            | 3.2        | xxiv-001              | 2            | 4.5        |
| 12   | xxiv-013              | 0            | 1.4        | xxiv-021              | 0            | 3.3        | xxiv-016              | 0            | 4.6        |
| 13   | xxiv-037              | 0            | 1.5        | xxiv-019              | 0            | 3.5        | xxiv-021              | 0            | 4.9        |
| 14   | xxiv-021              | 0            | 1.5        | xxiv-009              | 0            | 3.6        | xxiv-022              | 0            | 5.0        |
| 15   | xxiv-007              | 0            | 1.6        | xxiv-007              | 0            | 3.6        | xxiv-055              | 0            | 5.2        |
| 16   | xxiv-014              | 0            | 1.7        | xxiv-005              | 0            | 3.6        | xxiv-007              | 0            | 5.3        |
| 17   | xxiv-028              | 1            | 1.7        | xxiv-023              | 1            | 3.9        | xxiv-042              | 0            | 5.5        |
| 18   | xxiv-boese-hofmann1-2 | 1            | 1.8        | xxiv-031              | 0            | 4.0        | xxiv-045              | 0            | 5.6        |
| 19   | xxiv-032              | 0            | 2.0        | xxiv-028              | 1            | 4.2        | xxiv-023              | 1            | 5.6        |
| 20   | xxiv-031              | 0            | 2.0        | xxiv-011              | 0            | 4.2        | xxiv-031              | 0            | 5.6        |
| 21   | xxiv-008              | 0            | 2.1        | xxiv-zhu1-2           | 1            | 4.3        | xxiv-028              | 1            | 5.7        |
| 22   | xxiv-zhu1-1           | 1            | 2.4        | xxiv-032              | 0            | 4.5        | xxiv-043              | 0            | 5.8        |
| 23   | xxiv-039              | 0            | 2.5        | xxiv-040              | 0            | 4.7        | xxiv-zhu1-2           | 1            | 5.8        |
| 24   | xxiv-080              | 0            | 2.5        | xxiv-042              | 0            | 4.8        | xxiv-029              | 0            | 5.9        |
| 25   | xxiv-019              | 0            | 2.6        | xxiv-049              | 0            | 4.8        | xxiv-tkatchenko1-1    | 4            | 6.1        |
| 26   | xxiv-020              | 1            | 2.7        | xxiv-055              | 0            | 5.3        | xxiv-049              | 0            | 6.1        |
| 27   | xxiv-040              | 0            | 2.9        | xxiv-037              | 0            | 5.3        | xxiv-032              | 0            | 6.1        |
| 28   | xxiv-027              | 0            | 2.9        | xxiv-043              | 0            | 5.4        | xxiv-005              | 0            | 6.1        |
| 29   | xxiv-049              | 0            | 3.0        | xxiv-045              | 0            | 5.4        | xxiv-040              | 0            | 6.2        |
| 30   | xxiv-042              | 0            | 3.1        | xxiv-058              | 0            | 5.6        | xxiv-011              | 0            | 6.3        |
| 31   | xxiv-035              | 0            | 3.1        | xxiv-014              | 0            | 5.7        | xxiv-053              | 0            | 7.1        |
| 32   | xxiv-009              | 0            | 3.1        | xxiv-029              | 0            | 5.8        | xxiv-058              | 0            | 7.4        |
| 33   | xxiv-054              | 0            | 3.4        | xxiv-054              | 0            | 5.8        | xxiv-024              | 0            | 7.5        |
| 34   | xxiv-034              | 0            | 3.5        | xxiv-013              | 0            | 5.9        | xxiv-050              | 0            | 7.5        |
| 35   | xxiv-058              | 0            | 3.8        | xxiv-050              | 0            | 5.9        | xxiv-052              | 0            | 7.6        |
| 36   | xxiv-059              | 1            | 4.0        | xxiv-039              | 0            | 6.0        | xxiv-062              | 0            | 7.9        |
| 37   | xxiv-067              | 0            | 4.1        | xxiv-024              | 0            | 6.3        | xxiv-054              | 0            | 7.9        |
| 38   | xxiv-074              | 0            | 4.1        | xxiv-063              | 4            | 6.4        | xxiv-044              | 0            | 8.0        |
| 39   | xxiv-050              | 0            | 4.2        | xxiv-062              | 0            | 6.6        | xxiv-033              | 0            | 8.0        |
| 40   | xxiv-024              | 0            | 4.4        | xxiv-034              | 0            | 6.9        | xxiv-065              | 0            | 8.2        |
| 41   | xxiv-062              | 0            | 4.4        | xxiv-052              | 0            | 6.9        | xxiv-039              | 0            | 8.3        |
| 42   | xxiv-087              | 0            | 4.4        | xxiv-035              | 0            | 6.9        | xxiv-037              | 0            | 8.4        |
| 43   | xxiv-038              | 0            | 4.4        | xxiv-033              | 0            | 7.0        | xxiv-030              | 0            | 8.6        |
| 44   | xxiv-025              | 1            | 4.8        | xxiv-030              | 0            | 7.1        | xxiv-014              | 0            | 8.6        |
| 45   | xxiv-045              | 0            | 4.8        | xxiv-020              | 1            | 7.1        | xxiv-108              | 1            | 8.7        |
| 46   | xxiv-043              | 0            | 4.9        | xxiv-073              | 0            | 7.5        | xxiv-073              | 0            | 8.9        |
| 47   | xxiv-030              | 0            | 4.9        | xxiv-087              | 0            | 7.6        | xxiv-089              | 0            | 9.1        |
| 48   | xxiv-047              | 0            | 4.9        | xxiv-044              | 0            | 7.7        | xxiv-078              | 0            | 9.2        |
| 49   | xxiv-017              | 0            | 5.0        | xxiv-017              | 0            | 7.8        | xxiv-013              | 0            | 9.3        |
| 50   | xxiv-055              | 0            | 5.0        | xxiv-074              | 0            | 7.8        | xxiv-034              | 0            | 9.6        |
| 51   | xxiv-029              | 0            | 5.1        | xxiv-080              | 0            | 7.8        | xxiv-081              | 0            | 9.6        |
| 52   | xxiv-091              | 0            | 5.1        | xxiv-089              | 0            | 7.9        | xxiv-070              | 0            | 9.7        |
| 53   | xxiv-079              | 0            | 5.2        | xxiv-053              | 0            | 7.9        | xxiv-017              | 0            | 10.0       |
| 54   | xxiv-096              | 0            | 5.3        | xxiv-078              | 0            | 8.1        | xxiv-035              | 0            | 10.0       |
| 55   | xxiv-077              | 0            | 5.4        | xxiv-067              | 0            | 8.1        | xxiv-087              | 0            | 10.0       |
| 56   | xxiv-046              | 0            | 5.4        | xxiv-081              | 0            | 8.2        | xxiv-020              | 1            | 10.3       |
| 57   | xxiv-048              | 0            | 5.4        | xxiv-065              | 0            | 8.2        | xxiv-100              | 0            | 10.4       |
| 58   | xxiv-033              | 0            | 5.5        | xxiv-070              | 0            | 8.3        | xxiv-day1-2           | 0            | 10.4       |
| 59   | xxiv-089              | 0            | 5.6        | xxiv-047              | 0            | 8.4        | xxiv-085              | 0            | 10.4       |
| 60   | xxiv-061              | 0            | 5.7        | xxiv-099              | 0            | 8.4        | xxiv-074              | 0            | 10.5       |
| 61   | xxiv-073              | 0            | 5.8        | xxiv-day1-2           | 0            | 8.4        | xxiv-099              | 0            | 10.8       |
| 62   | xxiv-099              | 0            | 5.8        | xxiv-077              | 0            | 8.5        | xxiv-093              | 0            | 10.9       |
| 63   | xxiv-tkatchenko1-2    | 0            | 5.8        | xxiv-tkatchenko1-2    | 0            | 8.6        | xxiv-tkatchenko1-2    | 0            | 10.9       |
| 64   | xxiv-071              | 0            | 5.8        | xxiv-091              | 0            | 8.7        | xxiv-047              | 0            | 10.9       |

Continued

| Rank | GGA                        |              |            | 25X                        |              |            | 50X                        |              |            |
|------|----------------------------|--------------|------------|----------------------------|--------------|------------|----------------------------|--------------|------------|
|      | Structure                  | # Duplicates | $\Delta E$ | Structure                  | # Duplicates | $\Delta E$ | Structure                  | # Duplicates | $\Delta E$ |
| 65   | xxiv-052                   | 0            | 5.9        | xxiv-025                   | 1            | 8.7        | xxiv-brandenburg-grimme2-2 | 1            | 10.9       |
| 66   | xxiv-068                   | 0            | 5.9        | xxiv-066                   | 0            | 8.7        | xxiv-067                   | 0            | 11.0       |
| 67   | xxiv-060                   | 0            | 5.9        | xxiv-096                   | 0            | 8.8        | xxiv-060                   | 0            | 11.0       |
| 68   | xxiv-069                   | 1            | 6.0        | xxiv-060                   | 0            | 8.9        | xxiv-077                   | 0            | 11.0       |
| 69   | xxiv-day1-2                | 0            | 6.0        | xxiv-108                   | 1            | 9.0        | xxiv-day1-1                | 0            | 11.0       |
| 70   | xxiv-066                   | 0            | 6.0        | xxiv-094                   | 0            | 9.1        | xxiv-064                   | 0            | 11.1       |
| 71   | xxiv-081                   | 0            | 6.1        | xxiv-085                   | 0            | 9.2        | xxiv-066                   | 0            | 11.2       |
| 72   | xxiv-094                   | 0            | 6.2        | xxiv-brandenburg-grimme2-2 | 1            | 9.2        | xxiv-091                   | 0            | 11.2       |
| 73   | xxiv-070                   | 0            | 6.2        | xxiv-059                   | 1            | 9.3        | xxiv-096                   | 0            | 11.3       |
| 74   | xxiv-063                   | 4            | 6.4        | xxiv-048                   | 0            | 9.4        | xxiv-094                   | 0            | 11.4       |
| 75   | xxiv-076                   | 0            | 6.6        | xxiv-095                   | 0            | 9.8        | xxiv-brandenburg-grimme2-3 | 1            | 11.4       |
| 76   | xxiv-083                   | 0            | 6.8        | xxiv-064                   | 0            | 9.9        | xxiv-025                   | 1            | 11.6       |
| 77   | xxiv-095                   | 0            | 6.8        | xxiv-068                   | 0            | 10.1       | xxiv-088                   | 0            | 11.8       |
| 78   | xxiv-brandenburg-grimme2-2 | 1            | 6.9        | xxiv-051                   | 1            | 10.1       | xxiv-095                   | 0            | 11.9       |
| 79   | xxiv-078                   | 0            | 6.9        | xxiv-061                   | 0            | 10.2       | xxiv-110                   | 1            | 12.1       |
| 80   | xxiv-082                   | 0            | 7.0        | xxiv-brandenburg-grimme2-3 | 1            | 10.3       | xxiv-051                   | 1            | 12.1       |
| 81   | xxiv-044                   | 0            | 7.1        | xxiv-069                   | 1            | 10.4       | xxiv-poly59-24-5           | 1            | 12.1       |
| 82   | xxiv-092                   | 1            | 7.1        | xxiv-day1-1                | 0            | 10.5       | xxiv-080                   | 0            | 12.2       |
| 83   | xxiv-051                   | 1            | 7.2        | xxiv-079                   | 0            | 10.6       | xxiv-048                   | 0            | 12.2       |
| 84   | xxiv-065                   | 0            | 7.6        | xxiv-093                   | 0            | 10.7       | xxiv-097                   | 0            | 12.2       |
| 85   | xxiv-064                   | 0            | 7.8        | xxiv-088                   | 0            | 10.7       | xxiv-084                   | 0            | 12.4       |
| 86   | xxiv-085                   | 0            | 7.9        | xxiv-086                   | 1            | 10.8       | xxiv-poly59-24-6           | 1            | 12.6       |
| 87   | xxiv-090                   | 0            | 8.3        | xxiv-100                   | 0            | 10.8       | xxiv-tkatchenko1-3         | 0            | 12.9       |
| 88   | xxiv-084                   | 0            | 8.3        | xxiv-tkatchenko1-3         | 0            | 10.8       | xxiv-068                   | 0            | 13.1       |
| 89   | xxiv-053                   | 0            | 8.3        | xxiv-082                   | 0            | 10.8       | xxiv-059                   | 1            | 13.2       |
| 90   | xxiv-tkatchenko1-3         | 0            | 8.4        | xxiv-084                   | 0            | 10.8       | xxiv-086                   | 1            | 13.4       |
| 91   | xxiv-075                   | 0            | 8.9        | xxiv-083                   | 0            | 10.8       | xxiv-083                   | 0            | 13.6       |
| 92   | xxiv-brandenburg-grimme2-3 | 1            | 8.9        | xxiv-076                   | 0            | 11.0       | xxiv-082                   | 0            | 13.7       |
| 93   | xxiv-088                   | 0            | 9.2        | xxiv-097                   | 0            | 11.0       | xxiv-069                   | 1            | 13.7       |
| 94   | xxiv-097                   | 0            | 9.3        | xxiv-071                   | 0            | 11.0       | xxiv-061                   | 0            | 13.7       |
| 95   | xxiv-108                   | 1            | 9.4        | xxiv-038                   | 0            | 11.5       | xxiv-brandenburg-grimme1-3 | 2            | 14.1       |
| 96   | xxiv-093                   | 0            | 9.6        | xxiv-poly59-24-5           | 1            | 11.6       | xxiv-076                   | 0            | 14.1       |
| 97   | xxiv-day1-1                | 0            | 10.2       | xxiv-090                   | 0            | 11.7       | xxiv-090                   | 0            | 14.4       |
| 98   | xxiv-100                   | 0            | 10.4       | xxiv-110                   | 1            | 11.8       | xxiv-boese-hofmann1-3      | 0            | 14.5       |
| 99   | xxiv-poly59-24-5           | 1            | 10.6       | xxiv-046                   | 0            | 12.1       | xxiv-brandenburg-grimme1-2 | 0            | 14.6       |
| 100  | xxiv-brandenburg-grimme1-3 | 2            | 10.6       | xxiv-106                   | 1            | 12.3       | xxiv-075                   | 0            | 14.9       |
| 101  | xxiv-poly59-24-9           | 2            | 10.9       | xxiv-075                   | 0            | 12.4       | xxiv-079                   | 0            | 14.9       |
| 102  | xxiv-boese-hofmann1-3      | 0            | 11.0       | xxiv-brandenburg-grimme1-3 | 2            | 12.6       | xxiv-071                   | 0            | 15.0       |
| 103  | xxiv-107                   | 1            | 11.0       | xxiv-boese-hofmann1-3      | 0            | 13.0       | xxiv-poly59-24-7           | 1            | 15.3       |
| 104  | xxiv-110                   | 1            | 11.3       | xxiv-brandenburg-grimme1-2 | 0            | 13.3       | xxiv-day1-3                | 2            | 15.5       |
| 105  | xxiv-106                   | 1            | 11.5       | xxiv-poly59-24-7           | 1            | 13.5       | xxiv-brandenburg-grimme1-1 | 0            | 16.3       |
| 106  | xxiv-brandenburg-grimme1-2 | 0            | 11.8       | xxiv-poly59-24-9           | 2            | 13.5       | xxiv-vaneijck1-2           | 0            | 16.7       |
| 107  | xxiv-brandenburg-grimme1-1 | 0            | 12.1       | xxiv-brandenburg-grimme1-1 | 0            | 14.5       | xxiv-vaneijck1-3           | 0            | 16.7       |
| 108  | xxiv-vaneijck1-3           | 0            | 14.6       | xxiv-vaneijck1-3           | 0            | 15.7       | xxiv-038                   | 0            | 16.9       |
| 109  | xxiv-vaneijck1-2           | 0            | 14.7       | xxiv-vaneijck1-2           | 0            | 15.8       | xxiv-046                   | 0            | 17.3       |
| 110  | xxiv-price2-1              | 0            | 14.9       | xxiv-price2-1              | 0            | 17.0       | xxiv-price1-1              | 1            | 17.6       |
| 111  | xxiv-price2-2              | 0            | 15.1       | xxiv-price1-1              | 1            | 17.2       | xxiv-price1-3              | 0            | 18.7       |
| 112  | xxiv-vaneijck1-1           | 1            | 17.0       | xxiv-price2-2              | 0            | 17.3       | xxiv-price2-1              | 0            | 19.0       |
| 113  | xxiv-facelli1-1            | 0            | 17.4       | xxiv-price1-3              | 0            | 18.1       | xxiv-price2-2              | 0            | 19.4       |
| 114  | xxiv-price1-3              | 0            | 17.7       | xxiv-facelli1-1            | 0            | 20.0       | xxiv-facelli1-1            | 0            | 22.0       |
| 115  | xxiv-hofmann1-1            | 0            | 19.4       | xxiv-hofmann1-1            | 0            | 21.4       | xxiv-hofmann1-1            | 0            | 22.9       |
| 116  | xxiv-price2-3              | 0            | 19.8       | xxiv-price2-3              | 0            | 21.5       | xxiv-price2-3              | 0            | 23.3       |
| 117  | xxiv-szalewicz1-3          | 0            | 21.6       | xxiv-hofmann1-3            | 0            | 23.1       | xxiv-hofmann1-3            | 0            | 24.0       |
| 118  | xxiv-szalewicz1-1          | 0            | 21.9       | xxiv-szalewicz1-3          | 0            | 24.3       | xxiv-price1-2              | 0            | 25.6       |
| 119  | xxiv-hofmann1-3            | 0            | 22.0       | xxiv-price1-2              | 0            | 24.3       | xxiv-szalewicz1-3          | 0            | 26.5       |
| 120  | xxiv-szalewicz1-2          | 0            | 22.9       | xxiv-szalewicz1-1          | 0            | 24.7       | xxiv-facelli1-2            | 0            | 26.5       |
| 121  | xxiv-price1-2              | 0            | 23.2       | xxiv-szalewicz1-2          | 0            | 25.7       | xxiv-szalewicz1-1          | 0            | 26.6       |
| 122  | xxiv-hofmann1-2            | 0            | 24.3       | xxiv-facelli1-2            | 0            | 26.7       | xxiv-szalewicz1-2          | 0            | 28.1       |
| 123  | xxiv-facelli1-2            | 0            | 26.8       | xxiv-hofmann1-2            | 0            | 27.9       | xxiv-elking-fustimolnar1-3 | 0            | 30.4       |
| 124  | xxiv-elking-fustimolnar1-3 | 0            | 30.9       | xxiv-elking-fustimolnar1-3 | 0            | 30.5       | xxiv-hofmann1-2            | 0            | 31.0       |
| 125  | xxiv-elking-fustimolnar2-2 | 0            | 35.6       | xxiv-elking-fustimolnar2-2 | 0            | 35.4       | xxiv-elking-fustimolnar2-2 | 0            | 35.0       |
| 126  | xxiv-elking-fustimolnar2-1 | 0            | 36.3       | xxiv-elking-fustimolnar1-1 | 0            | 37.1       | xxiv-elking-fustimolnar1-1 | 0            | 37.7       |
| 127  | xxiv-elking-fustimolnar1-1 | 0            | 36.6       | xxiv-elking-fustimolnar2-1 | 0            | 37.3       | xxiv-elking-fustimolnar2-1 | 0            | 37.8       |
| 128  | xxiv-elking-fustimolnar2-3 | 0            | 39.3       | xxiv-elking-fustimolnar1-2 | 0            | 41.1       | xxiv-elking-fustimolnar1-2 | 0            | 39.3       |
| 129  | xxiv-elking-fustimolnar1-2 | 0            | 43.6       | xxiv-elking-fustimolnar2-3 | 0            | 41.7       | xxiv-elking-fustimolnar2-3 | 0            | 43.7       |

TABLE XXVI: Computed energy ranking for unique candidate structures of compound XXV, 2,8-dimethyl-6H,12H-5,11-methanodibenzo[b,f][1,5]diazocine:3,5-dinitrobenzoic acid. Energies are expressed relative to the experimental form, in kJ/mol.

| Rank | GGA                        |              |            | 25X                       |              |            | 50X                       |              |            |
|------|----------------------------|--------------|------------|---------------------------|--------------|------------|---------------------------|--------------|------------|
|      | Structure                  | # Duplicates | $\Delta E$ | Structure                 | # Duplicates | $\Delta E$ | Structure                 | # Duplicates | $\Delta E$ |
| 1    | xxv-expt                   | 10           | 0.0        | xxv-expt                  | 10           | 0.0        | xxv-expt                  | 10           | 0.0        |
| 2    | xxv-poly59-25-1            | 5            | 0.8        | xxv-mohamed1-2            | 5            | 2.9        | xxv-021                   | 5            | 4.7        |
| 3    | xxv-poly59-25-4            | 2            | 3.4        | xxv-goto-obata1-1         | 6            | 5.2        | xxv-day2-1                | 6            | 5.0        |
| 4    | xxv-facelli1-1             | 2            | 4.7        | xxv-poly59-25-4           | 2            | 5.5        | xxv-024                   | 0            | 5.5        |
| 5    | xxv-106                    | 4            | 4.9        | xxv-facelli1-2            | 4            | 5.6        | xxv-011                   | 0            | 5.9        |
| 6    | xxv-brandenburg-grimmel1-3 | 4            | 5.2        | xxv-011                   | 0            | 6.0        | xxv-facelli1-2            | 4            | 6.1        |
| 7    | xxv-104                    | 0            | 5.2        | xxv-012                   | 0            | 6.5        | xxv-poly59-25-4           | 2            | 6.3        |
| 8    | xxv-goto-obata1-1          | 6            | 5.4        | xxv-018                   | 1            | 6.8        | xxv-012                   | 0            | 6.6        |
| 9    | xxv-003                    | 5            | 5.5        | xxv-facelli1-1            | 2            | 6.9        | xxv-018                   | 1            | 6.9        |
| 10   | xxv-013                    | 0            | 5.7        | xxv-015                   | 0            | 7.0        | xxv-015                   | 0            | 7.1        |
| 11   | xxv-025                    | 0            | 5.8        | xxv-024                   | 0            | 7.1        | xxv-110                   | 2            | 7.3        |
| 12   | xxv-011                    | 0            | 6.0        | xxv-poly59-25-2           | 5            | 7.1        | xxv-poly59-25-2           | 5            | 8.0        |
| 13   | xxv-012                    | 0            | 6.1        | xxv-110                   | 2            | 7.3        | xxv-facelli1-1            | 2            | 8.3        |
| 14   | xxv-018                    | 1            | 6.3        | xxv-016                   | 4            | 7.6        | xxv-adjiman-pantelides1-2 | 8            | 8.4        |
| 15   | xxv-neumann1-2             | 2            | 6.4        | xxv-104                   | 0            | 7.6        | xxv-027                   | 0            | 8.7        |
| 16   | xxv-015                    | 0            | 6.6        | xxv-025                   | 0            | 8.4        | xxv-104                   | 0            | 8.9        |
| 17   | xxv-poly59-25-10           | 2            | 6.8        | xxv-027                   | 0            | 8.4        | xxv-036                   | 1            | 9.2        |
| 18   | xxv-017                    | 0            | 6.9        | xxv-adjiman-pantelides1-2 | 8            | 8.4        | xxv-029                   | 0            | 9.2        |
| 19   | xxv-007                    | 1            | 7.1        | xxv-033                   | 0            | 9.0        | xxv-041                   | 2            | 9.3        |
| 20   | xxv-poly59-25-5            | 1            | 7.4        | xxv-029                   | 0            | 9.2        | xxv-033                   | 0            | 9.5        |
| 21   | xxv-048                    | 0            | 7.6        | xxv-poly59-25-5           | 1            | 9.2        | xxv-016                   | 4            | 9.9        |
| 22   | xxv-026                    | 0            | 7.6        | xxv-013                   | 0            | 9.2        | xxv-066                   | 2            | 10.2       |
| 23   | xxv-027                    | 0            | 7.7        | xxv-035                   | 1            | 9.3        | xxv-048                   | 0            | 10.2       |
| 24   | xxv-024                    | 0            | 8.0        | xxv-026                   | 0            | 9.4        | xxv-020                   | 1            | 10.4       |
| 25   | xxv-039                    | 0            | 8.3        | xxv-neumann1-2            | 2            | 9.5        | xxv-025                   | 0            | 10.5       |
| 26   | xxv-adjiman-pantelides1-2  | 8            | 8.4        | xxv-007                   | 1            | 9.6        | xxv-056                   | 0            | 10.6       |
| 27   | xxv-009                    | 0            | 8.5        | xxv-048                   | 0            | 9.7        | xxv-026                   | 0            | 10.7       |
| 28   | xxv-033                    | 0            | 8.5        | xxv-041                   | 2            | 9.8        | xxv-poly59-25-5           | 1            | 10.9       |
| 29   | xxv-099                    | 0            | 8.9        | xxv-066                   | 2            | 10.0       | xxv-008                   | 1            | 11.1       |
| 30   | xxv-036                    | 1            | 9.0        | xxv-020                   | 1            | 10.3       | xxv-042                   | 1            | 11.3       |
| 31   | xxv-029                    | 0            | 9.2        | xxv-017                   | 0            | 10.4       | xxv-043                   | 0            | 11.5       |
| 32   | xxv-poly59-25-9            | 2            | 9.3        | xxv-099                   | 0            | 10.6       | xxv-neumann1-2            | 2            | 11.5       |
| 33   | xxv-023                    | 0            | 9.4        | xxv-042                   | 1            | 10.9       | xxv-099                   | 0            | 11.8       |
| 34   | xxv-066                    | 2            | 9.4        | xxv-039                   | 0            | 11.2       | xxv-013                   | 0            | 11.9       |
| 35   | xxv-034                    | 0            | 9.4        | xxv-poly59-25-7           | 3            | 11.4       | xxv-017                   | 0            | 12.3       |
| 36   | xxv-goto-obata1-2          | 1            | 9.5        | xxv-034                   | 0            | 11.5       | xxv-038                   | 0            | 12.6       |
| 37   | xxv-047                    | 0            | 9.9        | xxv-047                   | 0            | 11.6       | xxv-080                   | 0            | 12.6       |
| 38   | xxv-poly59-25-7            | 3            | 10.2       | xxv-056                   | 0            | 11.8       | xxv-poly59-25-7           | 3            | 12.6       |
| 39   | xxv-adjiman-pantelides1-3  | 1            | 10.3       | xxv-009                   | 0            | 11.9       | xxv-047                   | 0            | 12.8       |
| 40   | xxv-044                    | 0            | 10.6       | xxv-038                   | 0            | 11.9       | xxv-039                   | 0            | 12.9       |
| 41   | xxv-032                    | 0            | 10.7       | xxv-060                   | 0            | 12.2       | xxv-044                   | 0            | 13.0       |
| 42   | xxv-038                    | 0            | 10.8       | xxv-044                   | 0            | 12.3       | xxv-060                   | 0            | 13.0       |
| 43   | xxv-037                    | 0            | 11.1       | xxv-023                   | 0            | 12.5       | xxv-062                   | 0            | 13.3       |
| 44   | xxv-060                    | 0            | 11.2       | xxv-043                   | 0            | 12.6       | xxv-034                   | 0            | 13.3       |
| 45   | xxv-030                    | 0            | 11.3       | xxv-037                   | 0            | 12.9       | xxv-070                   | 0            | 13.5       |
| 46   | xxv-045                    | 0            | 11.6       | xxv-080                   | 0            | 13.1       | xxv-040                   | 0            | 13.5       |
| 47   | xxv-055                    | 0            | 11.6       | xxv-070                   | 0            | 13.1       | xxv-100                   | 0            | 13.5       |
| 48   | xxv-062                    | 0            | 12.1       | xxv-062                   | 0            | 13.1       | xxv-074                   | 0            | 13.5       |
| 49   | xxv-070                    | 0            | 12.1       | xxv-100                   | 0            | 13.5       | xxv-085                   | 0            | 13.7       |
| 50   | xxv-100                    | 0            | 12.2       | xxv-055                   | 0            | 13.5       | xxv-091                   | 0            | 13.7       |
| 51   | xxv-053                    | 0            | 12.2       | xxv-053                   | 0            | 13.7       | xxv-037                   | 0            | 13.8       |
| 52   | xxv-056                    | 0            | 12.3       | xxv-085                   | 0            | 13.7       | xxv-053                   | 0            | 14.2       |
| 53   | xxv-vandenende-cuppen1-2   | 0            | 12.3       | xxv-074                   | 0            | 13.9       | xxv-055                   | 0            | 14.4       |
| 54   | xxv-061                    | 0            | 12.6       | xxv-030                   | 0            | 14.0       | xxv-009                   | 0            | 14.5       |
| 55   | xxv-054                    | 0            | 12.9       | xxv-032                   | 0            | 14.1       | xxv-052                   | 0            | 14.5       |
| 56   | xxv-068                    | 0            | 13.0       | xxv-040                   | 0            | 14.1       | xxv-023                   | 0            | 15.3       |
| 57   | xxv-052                    | 0            | 13.1       | xxv-052                   | 0            | 14.1       | xxv-096                   | 0            | 15.3       |
| 58   | xxv-080                    | 0            | 13.2       | xxv-091                   | 0            | 14.3       | xxv-030                   | 0            | 15.4       |
| 59   | xxv-085                    | 0            | 13.2       | xxv-045                   | 0            | 14.6       | xxv-067                   | 1            | 15.5       |

Continued

| Rank | GGA                       |              |            | 25X                       |              |            | 50X                       |              |            |
|------|---------------------------|--------------|------------|---------------------------|--------------|------------|---------------------------|--------------|------------|
|      | Structure                 | # Duplicates | $\Delta E$ | Structure                 | # Duplicates | $\Delta E$ | Structure                 | # Duplicates | $\Delta E$ |
| 60   | xxv-083                   | 0            | 13.3       | xxv-vandenende-cuppen1-2  | 0            | 14.7       | xxv-075                   | 0            | 15.6       |
| 61   | xxv-074                   | 0            | 13.3       | xxv-054                   | 0            | 14.8       | xxv-054                   | 0            | 15.7       |
| 62   | xxv-046                   | 0            | 13.5       | xxv-096                   | 0            | 15.0       | xxv-057                   | 0            | 16.0       |
| 63   | xxv-057                   | 0            | 13.5       | xxv-046                   | 0            | 15.2       | xxv-vandenende-cuppen1-2  | 0            | 16.2       |
| 64   | xxv-043                   | 0            | 13.5       | xxv-075                   | 0            | 15.2       | xxv-079                   | 1            | 16.2       |
| 65   | xxv-050                   | 0            | 13.5       | xxv-089                   | 0            | 15.3       | xxv-089                   | 0            | 16.2       |
| 66   | xxv-067                   | 1            | 13.7       | xxv-057                   | 0            | 15.3       | xxv-032                   | 0            | 16.5       |
| 67   | xxv-059                   | 0            | 13.7       | xxv-067                   | 1            | 15.4       | xxv-046                   | 0            | 16.5       |
| 68   | xxv-040                   | 0            | 13.8       | xxv-079                   | 1            | 15.5       | xxv-072                   | 0            | 16.6       |
| 69   | xxv-075                   | 0            | 13.9       | xxv-068                   | 0            | 15.6       | xxv-045                   | 0            | 16.8       |
| 70   | xxv-065                   | 0            | 13.9       | xxv-061                   | 0            | 15.8       | xxv-073                   | 0            | 17.2       |
| 71   | xxv-096                   | 0            | 14.0       | xxv-050                   | 0            | 15.8       | xxv-068                   | 0            | 17.2       |
| 72   | xxv-081                   | 0            | 14.1       | xxv-072                   | 0            | 16.0       | xxv-elking-fustimolnar1-1 | 1            | 17.4       |
| 73   | xxv-089                   | 0            | 14.2       | xxv-081                   | 0            | 16.1       | xxv-077                   | 0            | 17.4       |
| 74   | xxv-077                   | 0            | 14.2       | xxv-077                   | 0            | 16.1       | xxv-086                   | 0            | 17.4       |
| 75   | xxv-072                   | 0            | 14.4       | xxv-086                   | 0            | 16.5       | xxv-081                   | 0            | 17.5       |
| 76   | xxv-boese-hofmann1-1      | 1            | 14.5       | xxv-059                   | 0            | 16.6       | xxv-050                   | 0            | 17.6       |
| 77   | xxv-091                   | 0            | 14.5       | xxv-083                   | 0            | 16.7       | xxv-090                   | 0            | 17.6       |
| 78   | xxv-069                   | 0            | 14.6       | xxv-elking-fustimolnar1-1 | 1            | 17.0       | xxv-097                   | 0            | 18.1       |
| 79   | xxv-086                   | 0            | 15.3       | xxv-065                   | 0            | 17.0       | xxv-061                   | 0            | 18.3       |
| 80   | xxv-058                   | 0            | 15.3       | xxv-097                   | 0            | 17.1       | xxv-083                   | 0            | 18.4       |
| 81   | xxv-097                   | 0            | 15.5       | xxv-090                   | 0            | 17.1       | xxv-058                   | 0            | 18.6       |
| 82   | xxv-093                   | 0            | 15.6       | xxv-058                   | 0            | 17.4       | xxv-059                   | 0            | 18.7       |
| 83   | xxv-094                   | 0            | 15.7       | xxv-069                   | 0            | 17.4       | xxv-093                   | 0            | 18.7       |
| 84   | xxv-063                   | 0            | 15.7       | xxv-073                   | 0            | 17.7       | xxv-094                   | 0            | 18.7       |
| 85   | xxv-092                   | 0            | 15.8       | xxv-094                   | 0            | 17.7       | xxv-076                   | 0            | 19.0       |
| 86   | xxv-082                   | 0            | 15.8       | xxv-093                   | 0            | 17.8       | xxv-063                   | 0            | 19.4       |
| 87   | xxv-090                   | 0            | 16.0       | xxv-063                   | 0            | 17.9       | xxv-088                   | 0            | 19.4       |
| 88   | xxv-elking-fustimolnar1-1 | 1            | 16.3       | xxv-092                   | 0            | 18.0       | xxv-092                   | 0            | 19.6       |
| 89   | xxv-088                   | 0            | 16.3       | xxv-088                   | 0            | 18.2       | xxv-065                   | 0            | 19.8       |
| 90   | xxv-076                   | 0            | 16.6       | xxv-076                   | 0            | 18.3       | xxv-078                   | 0            | 19.8       |
| 91   | xxv-073                   | 0            | 16.9       | xxv-082                   | 0            | 18.5       | xxv-069                   | 0            | 19.9       |
| 92   | xxv-071                   | 0            | 17.1       | xxv-078                   | 0            | 19.0       | xxv-082                   | 0            | 20.4       |
| 93   | xxv-facelli1-3            | 0            | 17.1       | xxv-071                   | 0            | 19.2       | xxv-071                   | 0            | 20.9       |
| 94   | xxv-078                   | 0            | 17.1       | xxv-087                   | 0            | 19.6       | xxv-098                   | 0            | 21.0       |
| 95   | xxv-vandenende-cuppen2-1  | 0            | 17.3       | xxv-098                   | 0            | 20.2       | xxv-087                   | 0            | 21.0       |
| 96   | xxv-087                   | 0            | 18.0       | xxv-facelli1-3            | 0            | 20.3       | xxv-vandenende-cuppen1-3  | 0            | 21.4       |
| 97   | xxv-098                   | 0            | 19.0       | xxv-vandenende-cuppen2-1  | 0            | 20.5       | xxv-mohamed1-1            | 0            | 21.5       |
| 98   | xxv-095                   | 0            | 19.0       | xxv-mohamed1-1            | 0            | 21.0       | xxv-goto-obata2-3         | 0            | 21.9       |
| 99   | xxv-084                   | 0            | 19.1       | xxv-vandenende-cuppen1-3  | 0            | 21.5       | xxv-facelli1-3            | 0            | 22.1       |
| 100  | xxv-mohamed1-1            | 0            | 20.3       | xxv-084                   | 0            | 21.6       | xxv-084                   | 0            | 22.3       |
| 101  | xxv-vandenende-cuppen1-3  | 0            | 20.8       | xxv-095                   | 0            | 22.6       | xxv-vandenende-cuppen2-1  | 0            | 22.7       |
| 102  | xxv-vandenende-cuppen1-1  | 0            | 21.1       | xxv-goto-obata2-3         | 0            | 22.8       | xxv-goto-obata2-1         | 0            | 22.8       |
| 103  | xxv-goto-obata2-3         | 0            | 22.8       | xxv-vandenende-cuppen1-1  | 0            | 23.1       | xxv-cole-1                | 0            | 23.7       |
| 104  | xxv-cole-1                | 0            | 24.1       | xxv-cole-1                | 0            | 24.7       | xxv-day2-3                | 0            | 24.3       |
| 105  | xxv-goto-obata2-1         | 0            | 26.0       | xxv-goto-obata2-1         | 0            | 25.0       | xxv-vandenende-cuppen1-1  | 0            | 25.0       |
| 106  | xxv-boese-hofmann1-2      | 0            | 26.2       | xxv-day2-3                | 0            | 27.7       | xxv-095                   | 0            | 25.3       |
| 107  | xxv-cole-2                | 0            | 29.4       | xxv-boese-hofmann1-2      | 0            | 28.7       | xxv-cole-2                | 0            | 28.5       |
| 108  | xxv-day2-3                | 0            | 30.8       | xxv-cole-2                | 0            | 29.4       | xxv-dzyabchenko-1         | 0            | 28.5       |
| 109  | xxv-dzyabchenko-3         | 0            | 31.8       | xxv-dzyabchenko-1         | 0            | 30.9       | xxv-boese-hofmann1-2      | 0            | 31.0       |
| 110  | xxv-boese-hofmann1-3      | 0            | 31.9       | xxv-dzyabchenko-3         | 0            | 32.0       | xxv-dzyabchenko-3         | 0            | 31.7       |
| 111  | xxv-dzyabchenko-1         | 0            | 32.8       | xxv-dzyabchenko-2         | 0            | 33.0       | xxv-dzyabchenko-2         | 0            | 32.5       |
| 112  | xxv-dzyabchenko-2         | 0            | 33.4       | xxv-boese-hofmann1-3      | 0            | 33.2       | xxv-boese-hofmann1-3      | 0            | 33.3       |
| 113  | xxv-goto-obata2-2         | 0            | 34.5       | xxv-goto-obata2-2         | 0            | 36.3       | xxv-goto-obata2-2         | 0            | 36.3       |
| 114  | xxv-vandenende-cuppen2-2  | 0            | 35.6       | xxv-vandenende-cuppen2-2  | 0            | 38.1       | xxv-vandenende-cuppen2-2  | 0            | 40.1       |
| 115  | xxv-cole-3                | 0            | 39.9       | xxv-cole-3                | 0            | 44.4       | xxv-cole-3                | 0            | 46.1       |
| 116  | xxv-hofmann1-1            | 0            | 48.4       | xxv-hofmann1-1            | 0            | 50.7       | xxv-hofmann1-1            | 0            | 51.9       |
| 117  | xxv-hofmann1-2            | 0            | 60.0       | xxv-hofmann1-2            | 0            | 61.6       | xxv-hofmann1-2            | 0            | 62.7       |
| 118  | xxv-hofmann1-3            | 0            | 61.0       | xxv-hofmann1-3            | 0            | 62.9       | xxv-hofmann1-3            | 0            | 64.3       |

TABLE XXVII: Computed energy ranking for unique candidate structures of compound XXVI, N,N'-([1,1'-Binaphthalene]-2,2'-diyl)bis(2-cholorobenzamide). Energies are expressed relative to the experimental form, in kJ/mol.

| Rank | GGA                        |              |            | 25X              |              |            | 50X              |              |            |
|------|----------------------------|--------------|------------|------------------|--------------|------------|------------------|--------------|------------|
|      | Structure                  | # Duplicates | $\Delta E$ | Structure        | # Duplicates | $\Delta E$ | Structure        | # Duplicates | $\Delta E$ |
| 1    | xxvi-expt                  | 8            | 0.0        | xxvi-expt        | 8            | 0.0        | xxvi-expt        | 8            | 0.0        |
| 2    | xxvi-neumann1-3            | 1            | 1.3        | xxvi-004         | 1            | 0.9        | xxvi-004         | 1            | 0.5        |
| 3    | xxvi-002                   | 8            | 2.0        | xxvi-025         | 0            | 1.9        | xxvi-025         | 0            | 0.9        |
| 4    | xxvi-005                   | 0            | 2.3        | xxvi-zhu1-1      | 6            | 2.0        | xxvi-zhu1-1      | 6            | 0.9        |
| 5    | xxvi-neumann2-3            | 1            | 2.4        | xxvi-neumann2-3  | 1            | 2.5        | xxvi-neumann2-3  | 1            | 2.6        |
| 6    | xxvi-010                   | 0            | 2.5        | xxvi-005         | 0            | 2.5        | xxvi-005         | 0            | 2.8        |
| 7    | xxvi-025                   | 0            | 3.0        | xxvi-neumann1-2  | 8            | 3.0        | xxvi-007         | 4            | 3.5        |
| 8    | xxvi-013                   | 1            | 3.3        | xxvi-010         | 0            | 3.2        | xxvi-010         | 0            | 4.1        |
| 9    | xxvi-006                   | 0            | 3.4        | xxvi-007         | 4            | 3.6        | xxvi-neumann1-2  | 8            | 4.2        |
| 10   | xxvi-018                   | 0            | 3.6        | xxvi-101         | 3            | 4.0        | xxvi-101         | 3            | 4.3        |
| 11   | xxvi-brandenburg-grimme1-2 | 6            | 3.7        | xxvi-021         | 1            | 4.2        | xxvi-015         | 0            | 4.6        |
| 12   | xxvi-011                   | 3            | 3.8        | xxvi-006         | 0            | 4.3        | xxvi-poly59-26-5 | 1            | 4.7        |
| 13   | xxvi-109                   | 4            | 3.8        | xxvi-015         | 0            | 4.6        | xxvi-099         | 0            | 5.1        |
| 14   | xxvi-036                   | 1            | 3.9        | xxvi-099         | 0            | 4.7        | xxvi-021         | 1            | 5.1        |
| 15   | xxvi-030                   | 1            | 3.9        | xxvi-036         | 1            | 4.8        | xxvi-072         | 0            | 5.4        |
| 16   | xxvi-041                   | 0            | 4.1        | xxvi-028         | 1            | 4.9        | xxvi-044         | 1            | 5.4        |
| 17   | xxvi-016                   | 0            | 4.2        | xxvi-018         | 0            | 5.0        | xxvi-006         | 0            | 5.4        |
| 18   | xxvi-012                   | 0            | 4.2        | xxvi-023         | 0            | 5.0        | xxvi-023         | 0            | 5.5        |
| 19   | xxvi-099                   | 0            | 4.3        | xxvi-012         | 0            | 5.1        | xxvi-065         | 0            | 5.5        |
| 20   | xxvi-008                   | 0            | 4.3        | xxvi-016         | 0            | 5.1        | xxvi-036         | 1            | 5.5        |
| 21   | xxvi-032                   | 0            | 4.4        | xxvi-072         | 0            | 5.1        | xxvi-017         | 0            | 5.7        |
| 22   | xxvi-034                   | 0            | 4.5        | xxvi-008         | 0            | 5.1        | xxvi-028         | 1            | 5.7        |
| 23   | xxvi-014                   | 0            | 4.5        | xxvi-065         | 0            | 5.2        | xxvi-008         | 0            | 5.8        |
| 24   | xxvi-054                   | 0            | 4.5        | xxvi-044         | 1            | 5.3        | xxvi-026         | 0            | 5.9        |
| 25   | xxvi-042                   | 0            | 4.6        | xxvi-041         | 0            | 5.3        | xxvi-047         | 0            | 5.9        |
| 26   | xxvi-040                   | 0            | 4.6        | xxvi-034         | 0            | 5.4        | xxvi-052         | 0            | 6.0        |
| 27   | xxvi-020                   | 0            | 4.6        | xxvi-026         | 0            | 5.4        | xxvi-034         | 0            | 6.1        |
| 28   | xxvi-058                   | 0            | 4.6        | xxvi-017         | 0            | 5.4        | xxvi-012         | 0            | 6.2        |
| 29   | xxvi-023                   | 0            | 4.7        | xxvi-032         | 0            | 5.4        | xxvi-016         | 0            | 6.2        |
| 30   | xxvi-078                   | 0            | 4.8        | xxvi-078         | 0            | 5.5        | xxvi-039         | 0            | 6.2        |
| 31   | xxvi-015                   | 0            | 4.8        | xxvi-054         | 0            | 5.6        | xxvi-018         | 0            | 6.2        |
| 32   | xxvi-072                   | 0            | 4.8        | xxvi-042         | 0            | 5.6        | xxvi-032         | 0            | 6.3        |
| 33   | xxvi-074                   | 0            | 4.9        | xxvi-014         | 0            | 5.6        | xxvi-078         | 0            | 6.3        |
| 34   | xxvi-065                   | 0            | 4.9        | xxvi-040         | 0            | 5.7        | xxvi-041         | 0            | 6.3        |
| 35   | xxvi-027                   | 0            | 4.9        | xxvi-027         | 0            | 5.7        | xxvi-042         | 0            | 6.4        |
| 36   | xxvi-026                   | 0            | 5.0        | xxvi-058         | 0            | 5.8        | xxvi-054         | 0            | 6.4        |
| 37   | xxvi-082                   | 0            | 5.0        | xxvi-020         | 0            | 5.8        | xxvi-068         | 0            | 6.4        |
| 38   | xxvi-067                   | 0            | 5.0        | xxvi-poly59-26-5 | 1            | 5.8        | xxvi-050         | 0            | 6.6        |
| 39   | xxvi-022                   | 0            | 5.0        | xxvi-052         | 0            | 5.9        | xxvi-014         | 0            | 6.6        |
| 40   | xxvi-017                   | 0            | 5.1        | xxvi-047         | 0            | 6.0        | xxvi-096         | 0            | 6.6        |
| 41   | xxvi-019                   | 0            | 5.2        | xxvi-019         | 0            | 6.0        | xxvi-019         | 0            | 6.7        |
| 42   | xxvi-044                   | 1            | 5.2        | xxvi-039         | 0            | 6.1        | xxvi-040         | 0            | 6.7        |
| 43   | xxvi-adjiman-pantelides1-1 | 8            | 5.2        | xxvi-074         | 0            | 6.1        | xxvi-027         | 0            | 6.7        |
| 44   | xxvi-075                   | 0            | 5.3        | xxvi-082         | 0            | 6.2        | xxvi-056         | 0            | 6.7        |
| 45   | xxvi-024                   | 0            | 5.3        | xxvi-075         | 0            | 6.3        | xxvi-077         | 0            | 6.8        |
| 46   | xxvi-035                   | 0            | 5.3        | xxvi-067         | 0            | 6.3        | xxvi-091         | 0            | 6.8        |
| 47   | xxvi-037                   | 0            | 5.4        | xxvi-022         | 0            | 6.3        | xxvi-049         | 0            | 6.8        |
| 48   | xxvi-092                   | 0            | 5.5        | xxvi-056         | 0            | 6.4        | xxvi-071         | 0            | 6.8        |
| 49   | xxvi-043                   | 0            | 5.6        | xxvi-049         | 0            | 6.4        | xxvi-057         | 0            | 6.9        |
| 50   | xxvi-038                   | 0            | 5.6        | xxvi-068         | 0            | 6.4        | xxvi-058         | 0            | 6.9        |
| 51   | xxvi-045                   | 0            | 5.7        | xxvi-024         | 0            | 6.4        | xxvi-089         | 0            | 6.9        |
| 52   | xxvi-031                   | 0            | 5.8        | xxvi-050         | 0            | 6.4        | xxvi-020         | 0            | 7.0        |
| 53   | xxvi-063                   | 0            | 5.9        | xxvi-057         | 0            | 6.4        | xxvi-031         | 0            | 7.0        |
| 54   | xxvi-039                   | 0            | 5.9        | xxvi-031         | 0            | 6.5        | xxvi-088         | 0            | 7.1        |
| 55   | xxvi-051                   | 0            | 5.9        | xxvi-096         | 0            | 6.5        | xxvi-074         | 0            | 7.1        |
| 56   | xxvi-052                   | 0            | 5.9        | xxvi-091         | 0            | 6.5        | xxvi-075         | 0            | 7.2        |
| 57   | xxvi-061                   | 0            | 6.0        | xxvi-035         | 0            | 6.6        | xxvi-024         | 0            | 7.2        |
| 58   | xxvi-056                   | 0            | 6.0        | xxvi-071         | 0            | 6.6        | xxvi-084         | 0            | 7.3        |
| 59   | xxvi-064                   | 0            | 6.0        | xxvi-037         | 0            | 6.7        | xxvi-070         | 0            | 7.3        |
| 60   | xxvi-049                   | 0            | 6.0        | xxvi-092         | 0            | 6.7        | xxvi-085         | 0            | 7.3        |

Continued

| Rank | GGA                   |              |            | 25X                        |              |            | 50X                        |              |            |
|------|-----------------------|--------------|------------|----------------------------|--------------|------------|----------------------------|--------------|------------|
|      | Structure             | # Duplicates | $\Delta E$ | Structure                  | # Duplicates | $\Delta E$ | Structure                  | # Duplicates | $\Delta E$ |
| 61   | xxvi-057              | 0            | 6.0        | xxvi-070                   | 0            | 6.8        | xxvi-082                   | 0            | 7.3        |
| 62   | xxvi-047              | 0            | 6.1        | xxvi-048                   | 0            | 6.8        | xxvi-048                   | 0            | 7.3        |
| 63   | xxvi-081              | 0            | 6.1        | xxvi-077                   | 0            | 6.8        | xxvi-067                   | 0            | 7.5        |
| 64   | xxvi-060              | 0            | 6.2        | xxvi-089                   | 0            | 6.9        | xxvi-029                   | 0            | 7.5        |
| 65   | xxvi-048              | 0            | 6.2        | xxvi-088                   | 0            | 6.9        | xxvi-092                   | 0            | 7.6        |
| 66   | xxvi-090              | 0            | 6.2        | xxvi-085                   | 0            | 6.9        | xxvi-035                   | 0            | 7.6        |
| 67   | xxvi-091              | 0            | 6.2        | xxvi-090                   | 0            | 7.0        | xxvi-080                   | 0            | 7.7        |
| 68   | xxvi-070              | 0            | 6.3        | xxvi-060                   | 0            | 7.0        | xxvi-037                   | 0            | 7.7        |
| 69   | xxvi-096              | 0            | 6.3        | xxvi-029                   | 0            | 7.0        | xxvi-090                   | 0            | 7.7        |
| 70   | xxvi-080              | 0            | 6.3        | xxvi-063                   | 0            | 7.0        | xxvi-060                   | 0            | 7.8        |
| 71   | xxvi-059              | 0            | 6.3        | xxvi-084                   | 0            | 7.0        | xxvi-022                   | 0            | 7.8        |
| 72   | xxvi-050              | 0            | 6.4        | xxvi-080                   | 0            | 7.1        | xxvi-093                   | 0            | 8.0        |
| 73   | xxvi-071              | 0            | 6.4        | xxvi-045                   | 0            | 7.2        | xxvi-062                   | 0            | 8.0        |
| 74   | xxvi-068              | 0            | 6.4        | xxvi-062                   | 0            | 7.2        | xxvi-095                   | 0            | 8.0        |
| 75   | xxvi-062              | 0            | 6.4        | xxvi-adjiman-pantelides1-2 | 8            | 7.2        | xxvi-063                   | 0            | 8.0        |
| 76   | xxvi-085              | 0            | 6.4        | xxvi-038                   | 0            | 7.3        | xxvi-086                   | 0            | 8.4        |
| 77   | xxvi-029              | 0            | 6.5        | xxvi-061                   | 0            | 7.3        | xxvi-059                   | 0            | 8.5        |
| 78   | xxvi-088              | 0            | 6.6        | xxvi-059                   | 0            | 7.4        | xxvi-097                   | 0            | 8.5        |
| 79   | xxvi-084              | 0            | 6.7        | xxvi-043                   | 0            | 7.4        | xxvi-083                   | 0            | 8.7        |
| 80   | xxvi-089              | 0            | 6.8        | xxvi-064                   | 0            | 7.5        | xxvi-098                   | 0            | 8.7        |
| 81   | xxvi-100              | 0            | 6.8        | xxvi-093                   | 0            | 7.6        | xxvi-061                   | 0            | 8.8        |
| 82   | xxvi-079              | 0            | 6.9        | xxvi-086                   | 0            | 7.7        | xxvi-045                   | 0            | 8.9        |
| 83   | xxvi-077              | 0            | 6.9        | xxvi-051                   | 0            | 7.8        | xxvi-038                   | 0            | 9.2        |
| 84   | xxvi-086              | 0            | 7.0        | xxvi-083                   | 0            | 7.9        | xxvi-064                   | 0            | 9.2        |
| 85   | xxvi-083              | 0            | 7.1        | xxvi-097                   | 0            | 7.9        | xxvi-dzyabchenko-1         | 1            | 9.2        |
| 86   | xxvi-094              | 0            | 7.1        | xxvi-098                   | 0            | 8.0        | xxvi-adjiman-pantelides1-2 | 8            | 9.2        |
| 87   | xxvi-087              | 0            | 7.1        | xxvi-095                   | 0            | 8.1        | xxvi-043                   | 0            | 9.3        |
| 88   | xxvi-098              | 0            | 7.1        | xxvi-100                   | 0            | 8.2        | xxvi-079                   | 0            | 9.4        |
| 89   | xxvi-093              | 0            | 7.1        | xxvi-079                   | 0            | 8.2        | xxvi-100                   | 0            | 9.5        |
| 90   | xxvi-053              | 0            | 7.2        | xxvi-081                   | 0            | 8.2        | xxvi-051                   | 0            | 9.8        |
| 91   | xxvi-069              | 0            | 7.3        | xxvi-094                   | 0            | 8.7        | xxvi-046                   | 0            | 10.1       |
| 92   | xxvi-097              | 0            | 7.3        | xxvi-087                   | 0            | 8.8        | xxvi-081                   | 0            | 10.4       |
| 93   | xxvi-poly59-26-5      | 1            | 7.4        | xxvi-046                   | 0            | 9.0        | xxvi-094                   | 0            | 10.4       |
| 94   | xxvi-046              | 0            | 8.0        | xxvi-069                   | 0            | 9.2        | xxvi-087                   | 0            | 10.5       |
| 95   | xxvi-095              | 0            | 8.7        | xxvi-053                   | 0            | 9.5        | xxvi-zhu1-2                | 0            | 10.7       |
| 96   | xxvi-zhu1-2           | 0            | 10.8       | xxvi-zhu1-2                | 0            | 10.5       | xxvi-069                   | 0            | 11.3       |
| 97   | xxvi-day1-2           | 0            | 11.3       | xxvi-day1-2                | 0            | 12.1       | xxvi-053                   | 0            | 11.7       |
| 98   | xxvi-poly59-26-10     | 1            | 13.4       | xxvi-dzyabchenko-1         | 1            | 12.2       | xxvi-poly59-26-10          | 1            | 11.8       |
| 99   | xxvi-poly59-26-7      | 1            | 13.5       | xxvi-poly59-26-10          | 1            | 12.4       | xxvi-dzyabchenko-2         | 0            | 12.0       |
| 100  | xxvi-zhu1-3           | 0            | 14.0       | xxvi-dzyabchenko-2         | 0            | 14.6       | xxvi-day1-2                | 0            | 12.6       |
| 101  | xxvi-day1-1           | 0            | 14.2       | xxvi-day1-1                | 0            | 14.6       | xxvi-dzyabchenko-3         | 0            | 14.6       |
| 102  | xxvi-poly59-26-8      | 1            | 15.1       | xxvi-poly59-26-8           | 1            | 14.9       | xxvi-poly59-26-8           | 1            | 15.0       |
| 103  | xxvi-vaneijck1-1      | 1            | 16.2       | xxvi-zhu1-3                | 0            | 15.1       | xxvi-vaneijck1-2           | 0            | 15.5       |
| 104  | xxvi-dzyabchenko-2    | 0            | 18.0       | xxvi-107                   | 1            | 15.4       | xxvi-day1-1                | 0            | 15.6       |
| 105  | xxvi-dzyabchenko-3    | 0            | 20.5       | xxvi-dzyabchenko-3         | 0            | 17.1       | xxvi-zhu1-3                | 0            | 16.0       |
| 106  | xxvi-hofmann1-3       | 0            | 21.7       | xxvi-vaneijck1-2           | 0            | 18.5       | xxvi-vaneijck1-3           | 0            | 16.9       |
| 107  | xxvi-vaneijck1-2      | 0            | 22.1       | xxvi-vaneijck1-3           | 0            | 19.7       | xxvi-107                   | 1            | 17.7       |
| 108  | xxvi-boese-hofmann1-1 | 0            | 22.7       | xxvi-boese-hofmann1-1      | 0            | 22.5       | xxvi-boese-hofmann1-1      | 0            | 22.5       |
| 109  | xxvi-vaneijck1-3      | 0            | 23.1       | xxvi-chadha-singh-1        | 1            | 23.6       | xxvi-cole-3                | 0            | 22.9       |
| 110  | xxvi-chadha-singh-1   | 1            | 24.7       | xxvi-cole-3                | 0            | 23.7       | xxvi-chadha-singh-1        | 1            | 23.7       |
| 111  | xxvi-cole-3           | 0            | 24.9       | xxvi-hofmann1-3            | 0            | 24.7       | xxvi-boese-hofmann1-2      | 0            | 25.3       |
| 112  | xxvi-cole-1           | 0            | 25.3       | xxvi-cole-1                | 0            | 25.4       | xxvi-cole-1                | 0            | 26.0       |
| 113  | xxvi-boese-hofmann1-2 | 0            | 26.4       | xxvi-boese-hofmann1-2      | 0            | 25.8       | xxvi-mohamed1-1            | 0            | 26.8       |
| 114  | xxvi-chadha-singh-3   | 0            | 28.2       | xxvi-mohamed1-1            | 0            | 27.5       | xxvi-hofmann1-3            | 0            | 27.5       |
| 115  | xxvi-mohamed1-1       | 0            | 28.3       | xxvi-chadha-singh-3        | 0            | 28.4       | xxvi-chadha-singh-3        | 0            | 29.2       |
| 116  | xxvi-mohamed1-3       | 0            | 28.5       | xxvi-mohamed1-3            | 0            | 29.5       | xxvi-boese-hofmann1-3      | 0            | 29.4       |
| 117  | xxvi-boese-hofmann1-3 | 0            | 31.2       | xxvi-boese-hofmann1-3      | 0            | 30.1       | xxvi-mohamed1-3            | 0            | 30.6       |
| 118  | xxvi-mohamed1-2       | 0            | 32.5       | xxvi-cole-2                | 0            | 32.5       | xxvi-cole-2                | 0            | 32.4       |
| 119  | xxvi-cole-2           | 0            | 33.5       | xxvi-mohamed1-2            | 0            | 35.0       | xxvi-mohamed1-2            | 0            | 37.9       |
| 120  | xxvi-hofmann1-2       | 0            | 39.8       | xxvi-hofmann1-2            | 0            | 42.8       | xxvi-hofmann1-2            | 0            | 45.4       |
| 121  | xxvi-hofmann1-1       | 0            | 56.2       | xxvi-hofmann1-1            | 0            | 58.1       | xxvi-hofmann1-1            | 0            | 59.8       |
